# Supplementary material for: Evidence of protonation induced intra-molecular metal-to-metal charge transfer in a highly symmetric cyanido bridged {Fe2Ni2} molecular square
Source: Royal Society of Chemistry journal article supplement (doi:10.1039/d0dt02826f), 2020-12-28
Supplement: d0dt02826f1.pdf [file d0dt02826f1.pdf]

## Electronic Supporting Information

### **Evidence of protonation induced intra-molecular metal-to-metal charge transfer in a highly symmetric cyanido bridged {Fe<sub>2</sub>Ni<sub>2</sub>} molecular square**

Prashurya Pritam Mudoi<sup>a</sup>, Bipul Sarma<sup>a</sup>, Anup Choudhury<sup>a</sup> and Nayanmoni Gogoi<sup>\*a</sup>

*a. Department of Chemical Sciences, Tezpur University, Napaam 784028, Sonitpur, Assam, India, Email: ngogoi@tezu.ernet.in*

## Table of Contents:

|                                                                                                                                                                                                      |     |
|------------------------------------------------------------------------------------------------------------------------------------------------------------------------------------------------------|-----|
| <b>Experimental details</b> .....                                                                                                                                                                    | S2  |
| <b>Figure S1.</b> Molecular structure of compound <b>1</b> .....                                                                                                                                     | S3  |
| <b>Figure S2.</b> FT-IR Spectrum of <b>1</b> as KBr disc.....                                                                                                                                        | S4  |
| <b>Figure S3.</b> FT-IR Spectra of <b>2</b> and <b>3</b> as KBr disc.....                                                                                                                            | S5  |
| <b>Figure S4.</b> Powder X-ray diffraction pattern of compound <b>2</b> .....                                                                                                                        | S6  |
| <b>Figure S5.</b> Powder X-ray diffraction pattern of compound <b>3</b> .....                                                                                                                        | S7  |
| <b>Figure S6.</b> TGA pattern of compound <b>2</b> .....                                                                                                                                             | S8  |
| <b>Figure S7.</b> TGA pattern of compound <b>3</b> .....                                                                                                                                             | S9  |
| <b>Figure S8.</b> Variation of $1/\chi_M$ against temperature for compound <b>3</b> .....                                                                                                            | S10 |
| <b>Figure S9.</b> Field dependence of magnetization of between 0-5 T for <b>3</b> .....                                                                                                              | S11 |
| <b>Figure S10.</b> Comparison between UV-visible Spectra of <b>2</b> in solid state with solution state.....                                                                                         | S12 |
| <b>Figure S11.</b> UV-visible Spectra of $[\text{Fe}(\text{bbp})(\text{CN})_3]^{2-}$ and <b>3</b> .....                                                                                              | S13 |
| <b>Figure S12.</b> Comparison between UV-visible Spectra of <b>3</b> in solid state with solution state.....                                                                                         | S14 |
| <b>Figure S13.</b> ESI-mass spectrum of <b>3</b> in the $m/z$ range 100-2000.....                                                                                                                    | S15 |
| <b>Figure S14.</b> ESI-mass spectrum of <b>3</b> in the $m/z$ range 1500-1800.....                                                                                                                   | S16 |
| <b>Figure S15.</b> Cyclic voltammogram of <b>1</b> and $\text{K}_2\text{Ni}(\text{CN})_4 \cdot \text{H}_2\text{O}$ .....                                                                             | S17 |
| <b>Figure S16.</b> Cyclic voltammogram of <b>3</b> .....                                                                                                                                             | S18 |
| <b>Figure S17.</b> Acid dependence of the $\{\text{Fe}^{\text{III}}(\mu\text{-CN})\text{Ni}^{\text{II}}\}/\{\text{Fe}^{\text{II}}(\mu\text{-CN})\text{Ni}^{\text{III}}\}$ fraction of <b>3</b> ..... | S19 |
| <b>Figure S18.</b> Base induced UV-visible Spectrum of <b>3</b> in DMSO medium.....                                                                                                                  | S20 |
| <b>Figure S19.</b> Cyclic voltammogram of <b>3</b> on acid addition.....                                                                                                                             | S21 |
| <b>Figure S20.</b> Cyclic voltammogram of <b>3</b> on various eq. of acid addition.....                                                                                                              | S22 |
| <b>Figure S21.</b> Possible sites for protonation in <b>3</b> .....                                                                                                                                  | S23 |
| <b>Table S1.</b> Crystal data and refinement parameters of compound <b>1</b> , <b>2</b> and <b>3</b> .....                                                                                           | S24 |
| <b>Table S2.</b> Selected bond lengths [ $\text{\AA}$ ] and bond angles [ $^\circ$ ] of <b>1</b> .....                                                                                               | S25 |
| <b>Table S3.</b> Selected bond lengths [ $\text{\AA}$ ] and bond angles [ $^\circ$ ] of <b>2</b> .....                                                                                               | S26 |
| <b>Table S4.</b> Selected bond lengths [ $\text{\AA}$ ] and bond angles [ $^\circ$ ] of <b>3</b> .....                                                                                               | S27 |
| <b>Table S5.</b> Comparison of structural properties of cyanido-bridged $\text{Fe}^{\text{III}}\text{-Ni}^{\text{II}}$ square complexes based on tricyanidoiron (III) building block.....            | S28 |
| <b>Table S6.</b> Magnetic parameters for selected square shaped cyanido-bridged $\text{Fe}^{\text{III}}\text{-Ni}^{\text{II}}$ complexes.....                                                        | S29 |
| <b>Table S7.</b> Electrochemical results of complexes <b>1</b> , <b>2</b> & <b>3</b> .....                                                                                                           | S30 |
| <b>References</b> .....                                                                                                                                                                              | S31 |

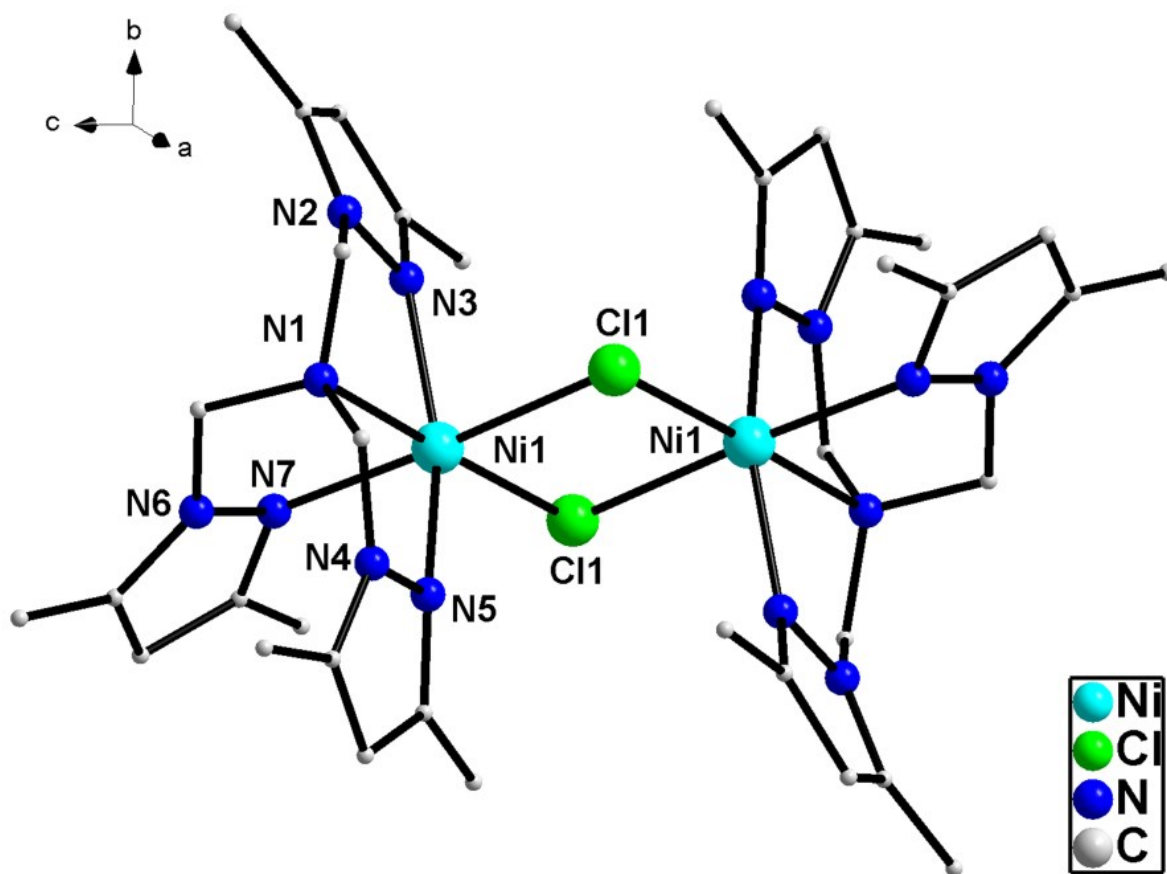

Figure S1: Molecular structure of compound 1. Counter ion BPh<sub>4</sub> units and aromatic hydrogen atoms are omitted for clarity.

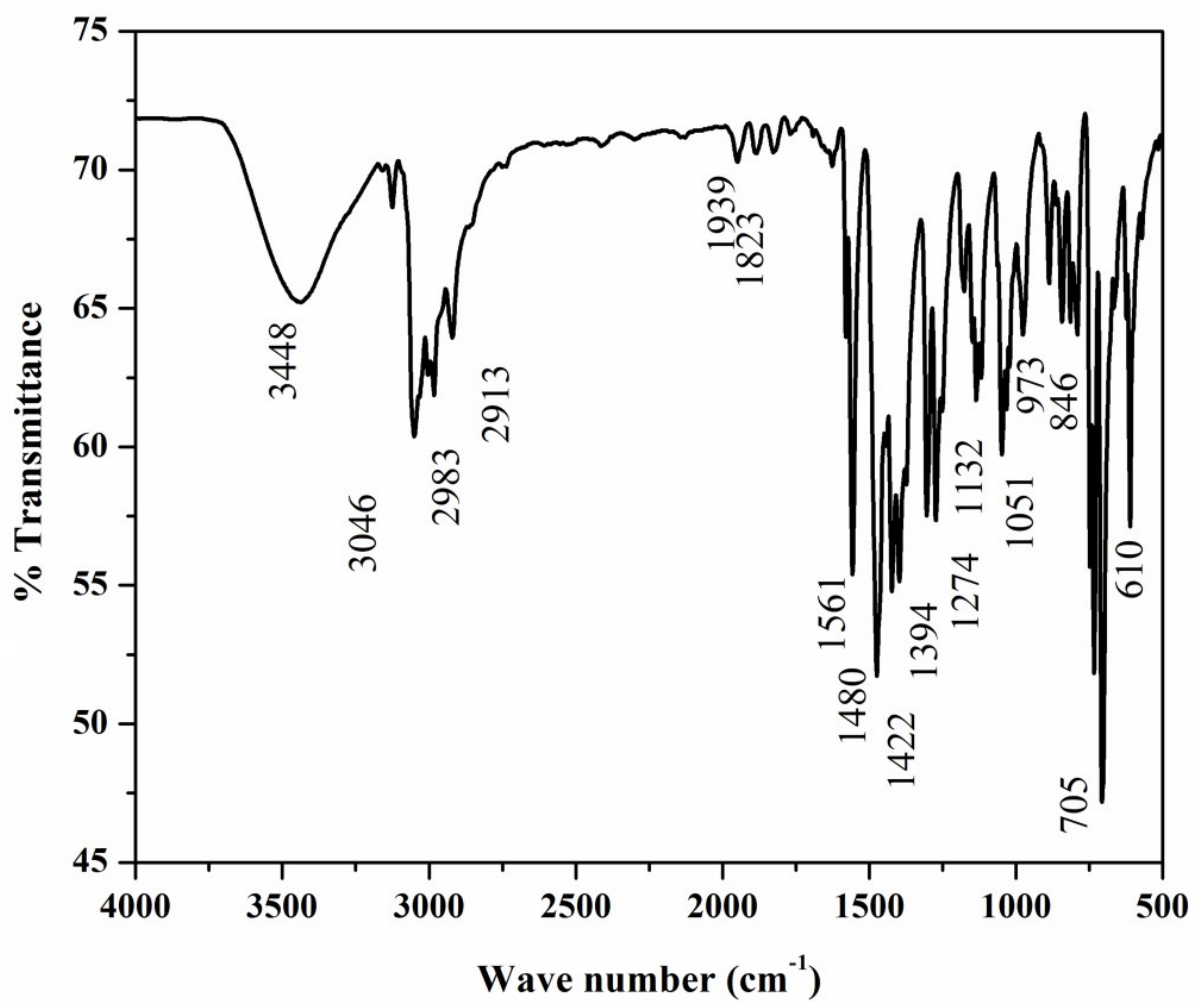

Figure S2: FT-IR spectrum of compound 1 as KBr disc

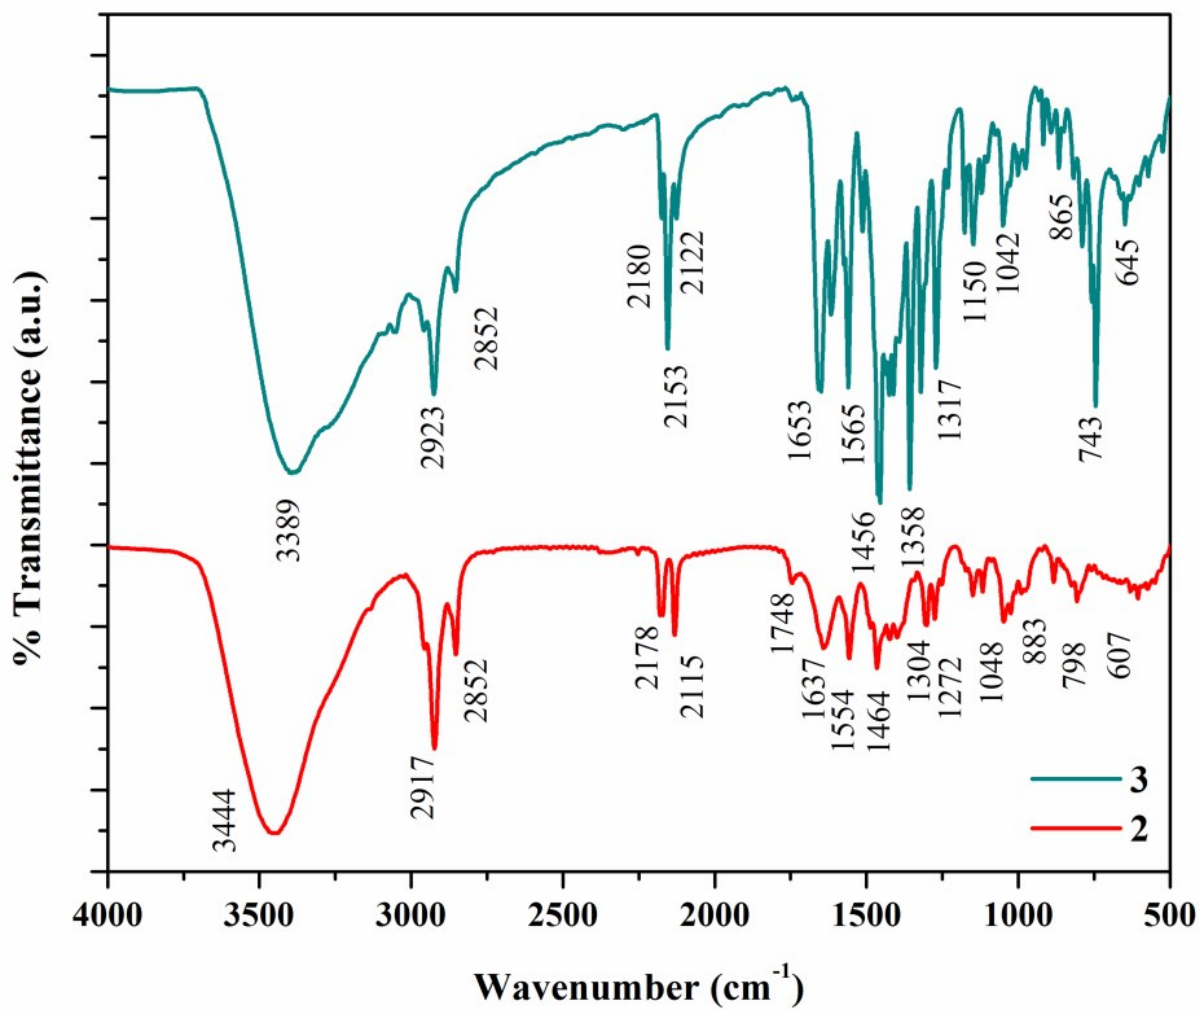

Figure S3: FT-IR spectra of compound 2 and 3 as KBr disc

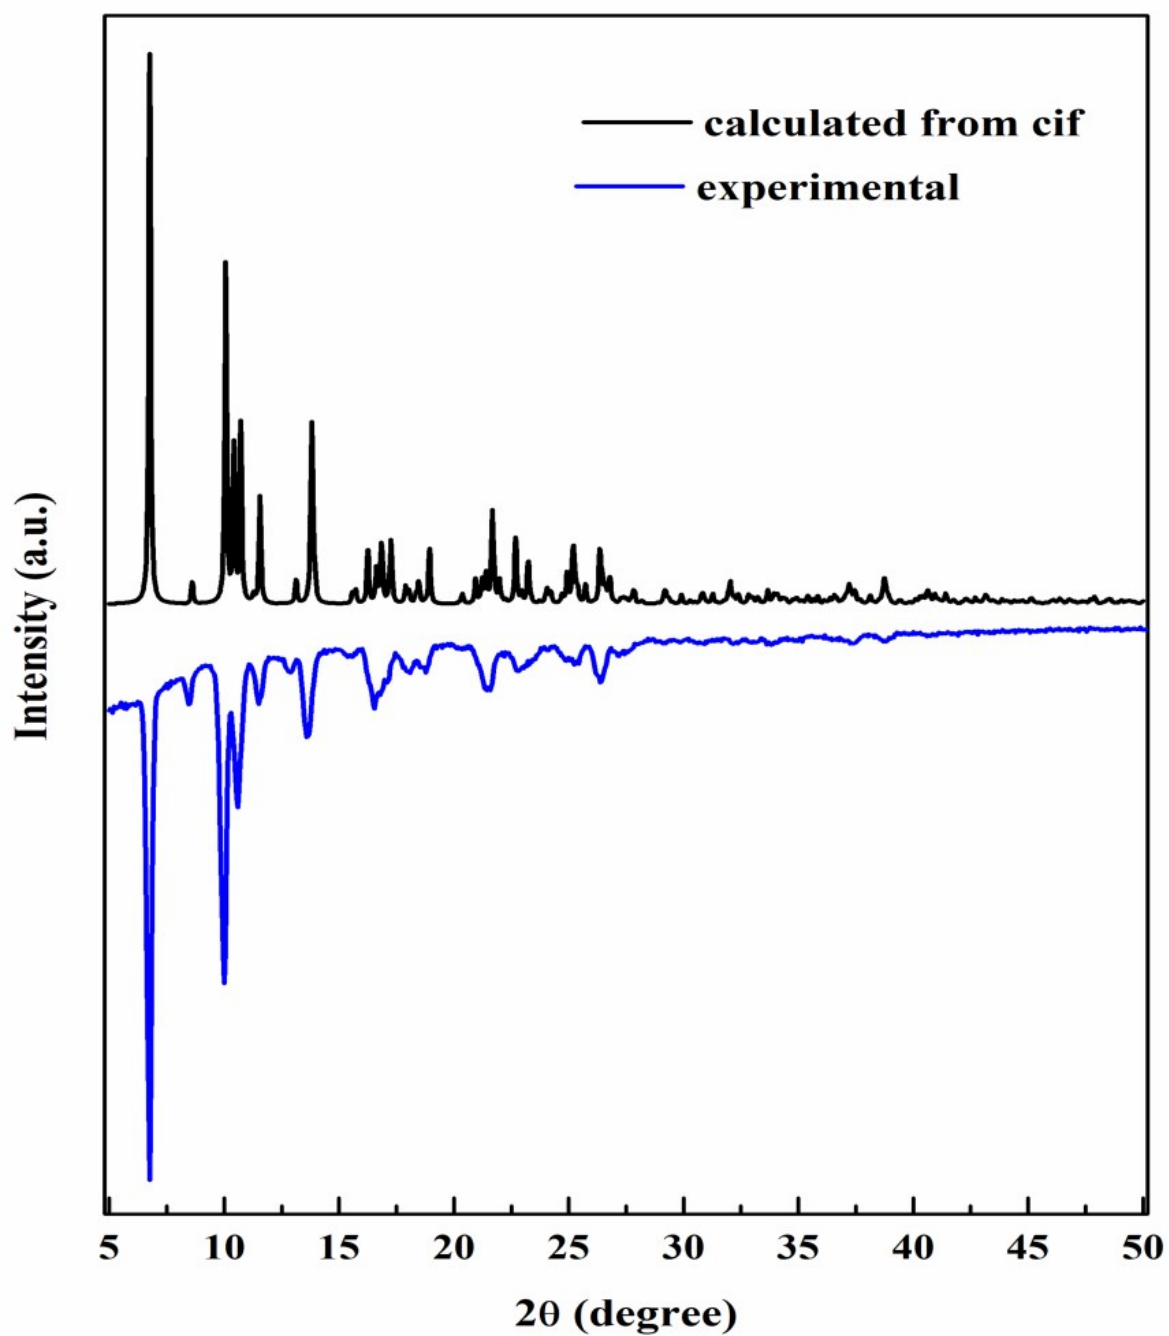

Figure S4: Experimental powder X-ray diffraction (PXRD) pattern of as synthesized **2** (blue solid line) compared with the respective X-ray diffraction pattern calculated from single-crystal X-ray data (black solid line).<sup>1</sup>

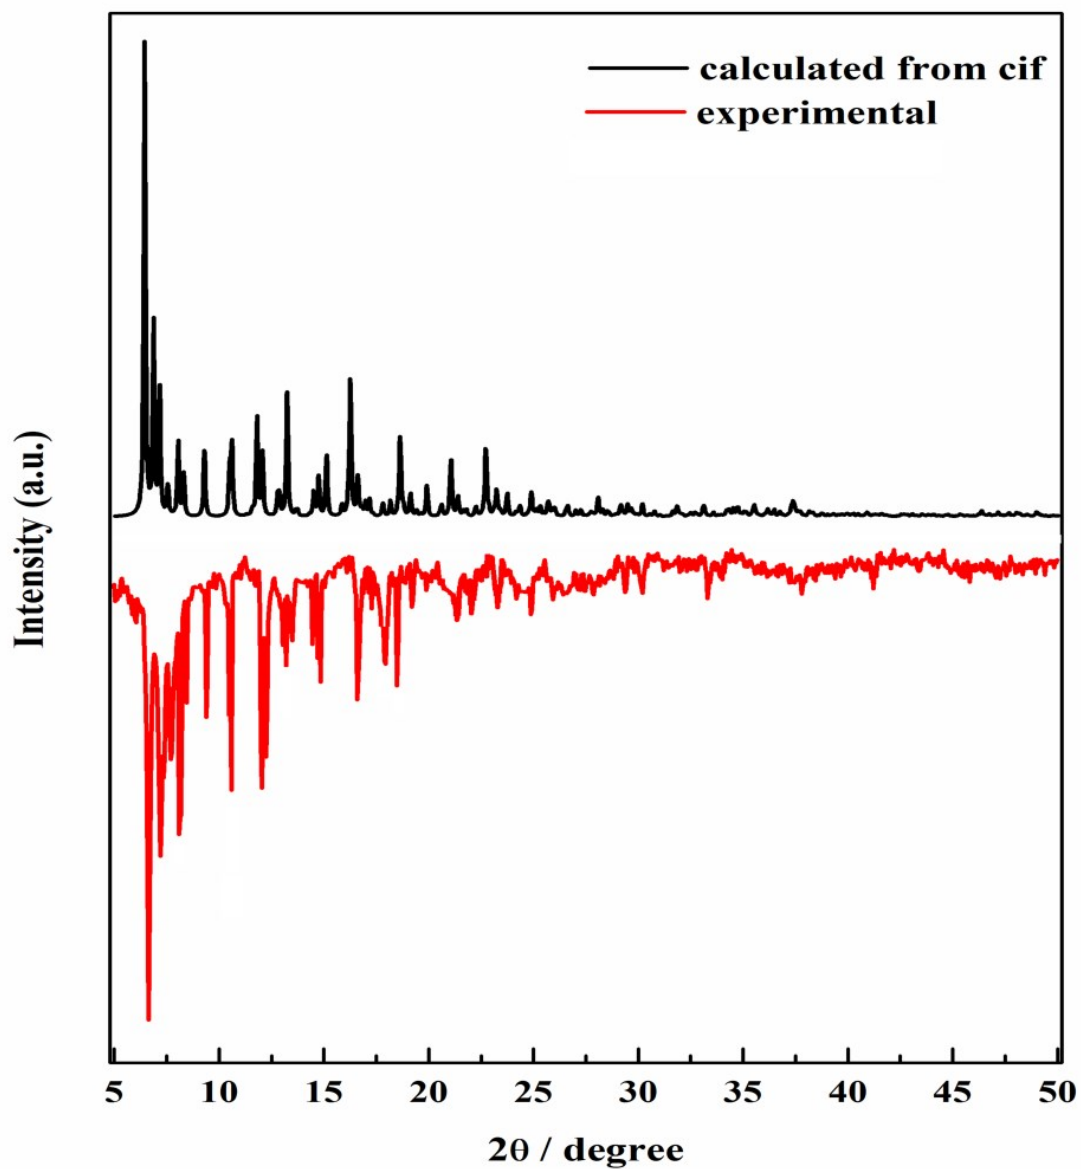

Figure S5: Experimental powder X-ray diffraction pattern of as synthesized **3** (red solid line) compared with the respective X-ray diffraction pattern calculated from single-crystal X-ray data (black solid line).<sup>2</sup>

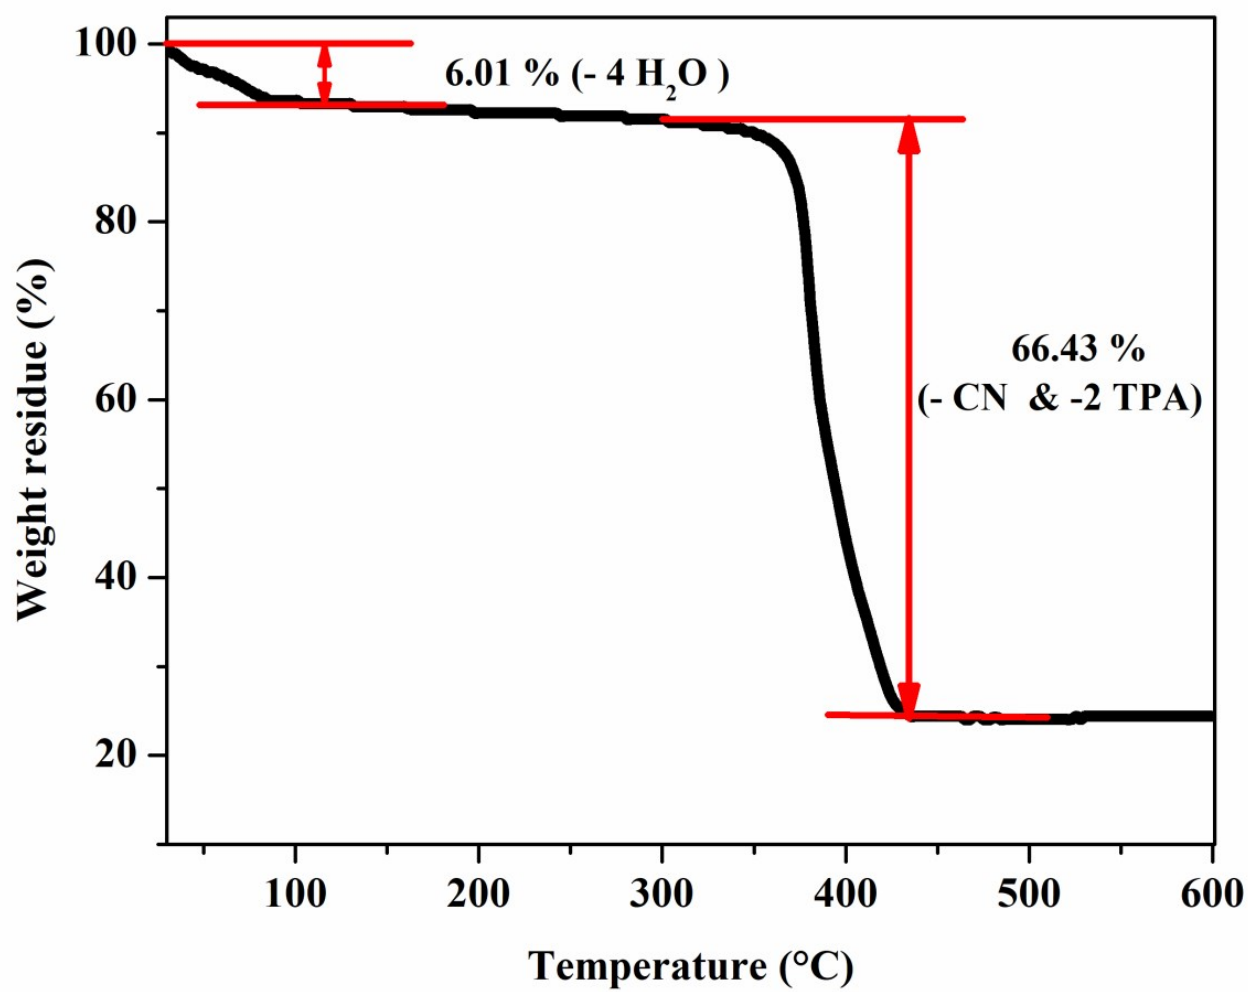

Figure S6: TGA pattern of compound 2 under N<sub>2</sub> atmosphere



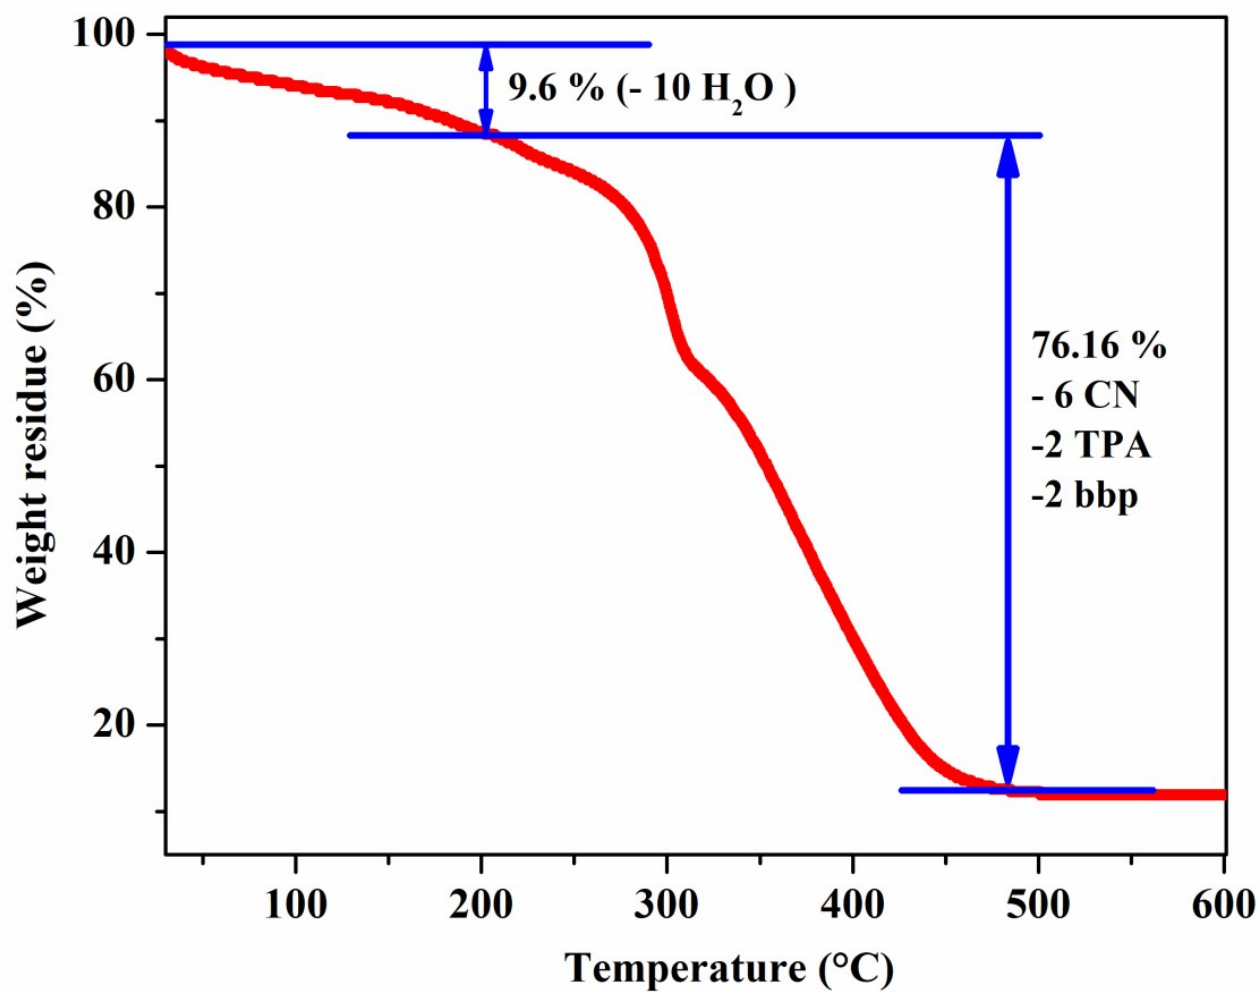

Figure S7: TGA pattern of compound 3.

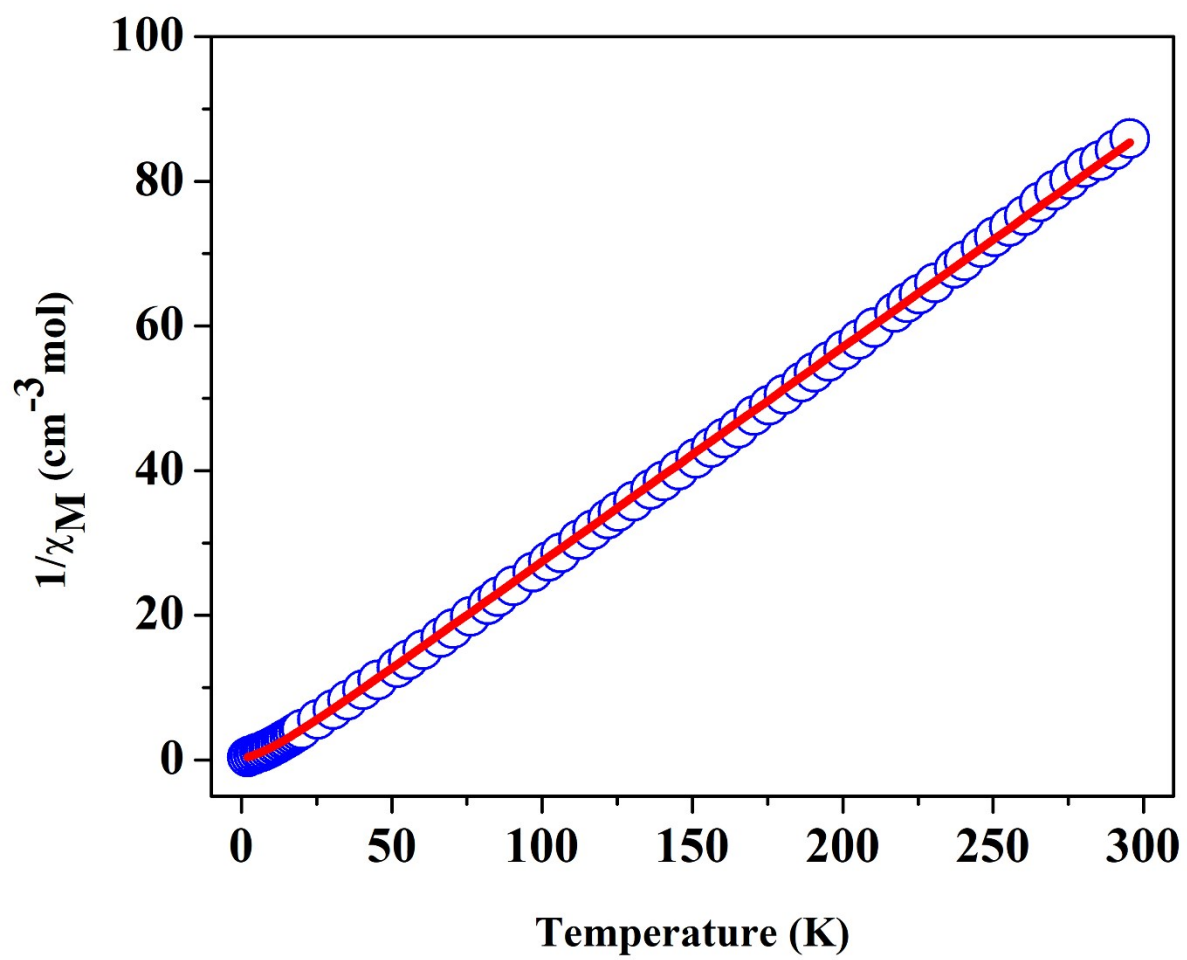

Figure S8: Variation of  $1/\chi_M$  against temperature for compound 3

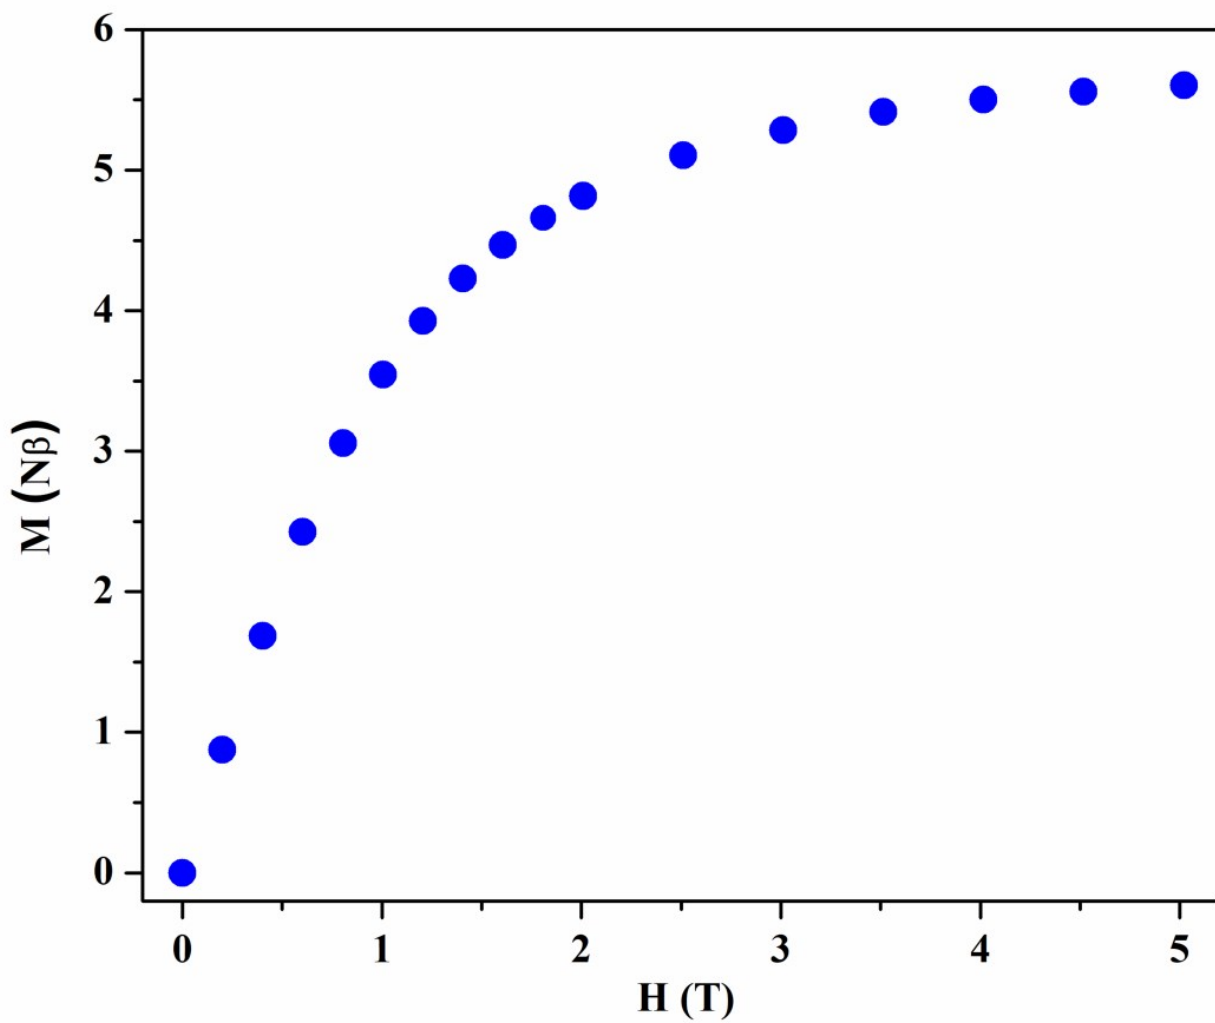

Figure S9: Field dependence of magnetization of between 0-5 T for **3** at 2 K.

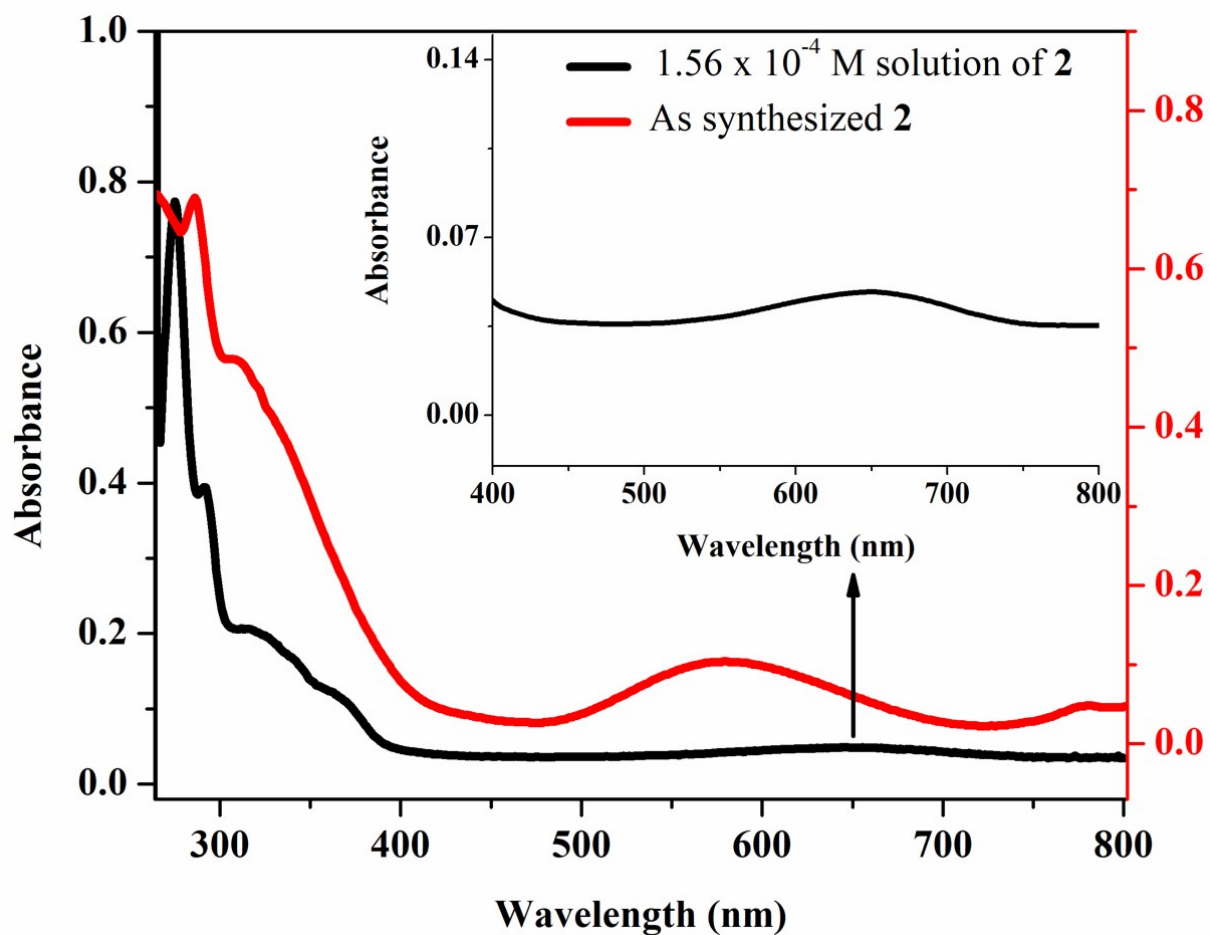

Figure S10: Comparison between UV-visible spectra of as synthesized **2** and  $1.56 \times 10^{-4}$  M solution of **2** in dimethyl formamide recorded at room temperature.

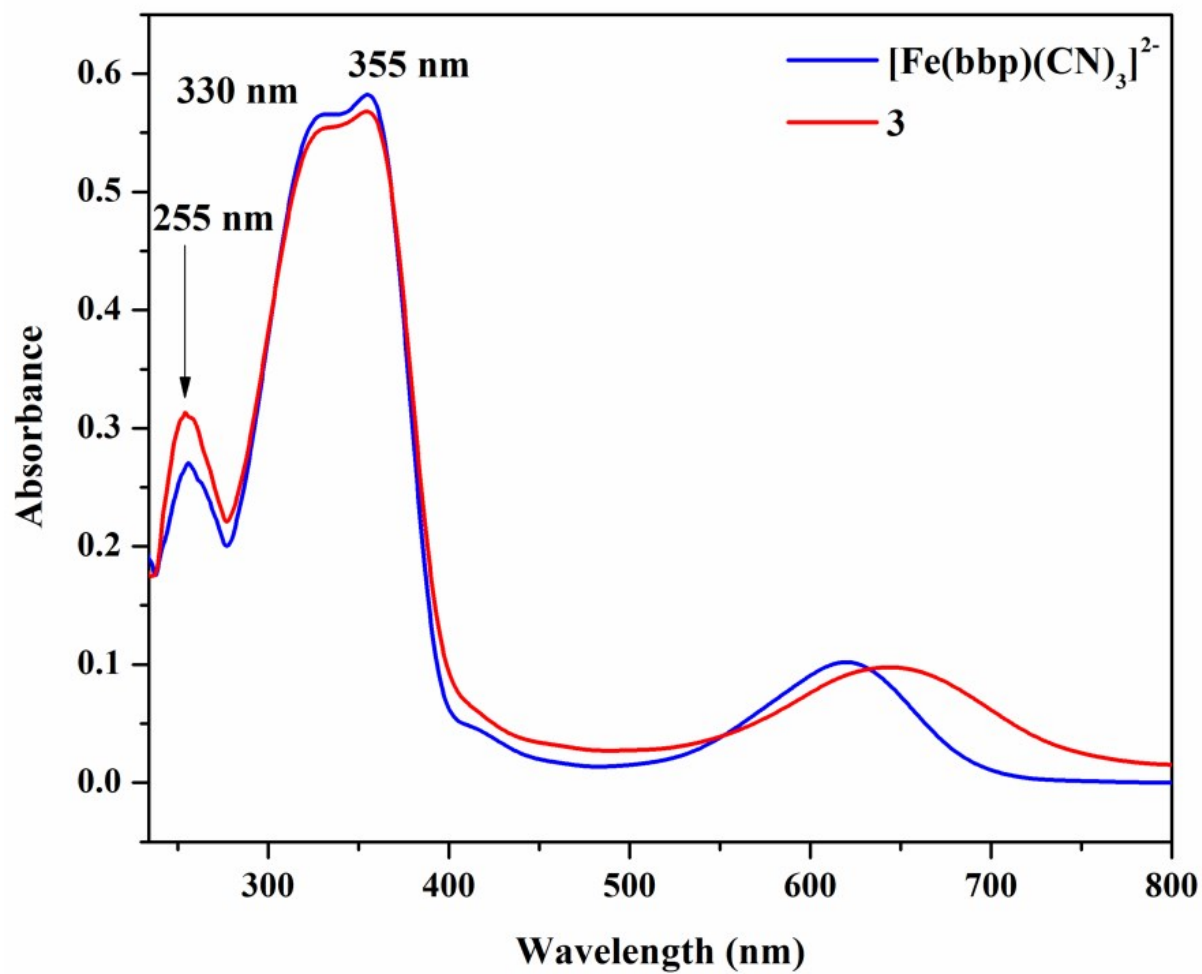

Figure S11: UV-visible spectra of  $[\text{Fe}(\text{bbp})(\text{CN})_3]^{2-}$  and **3** in DMSO medium

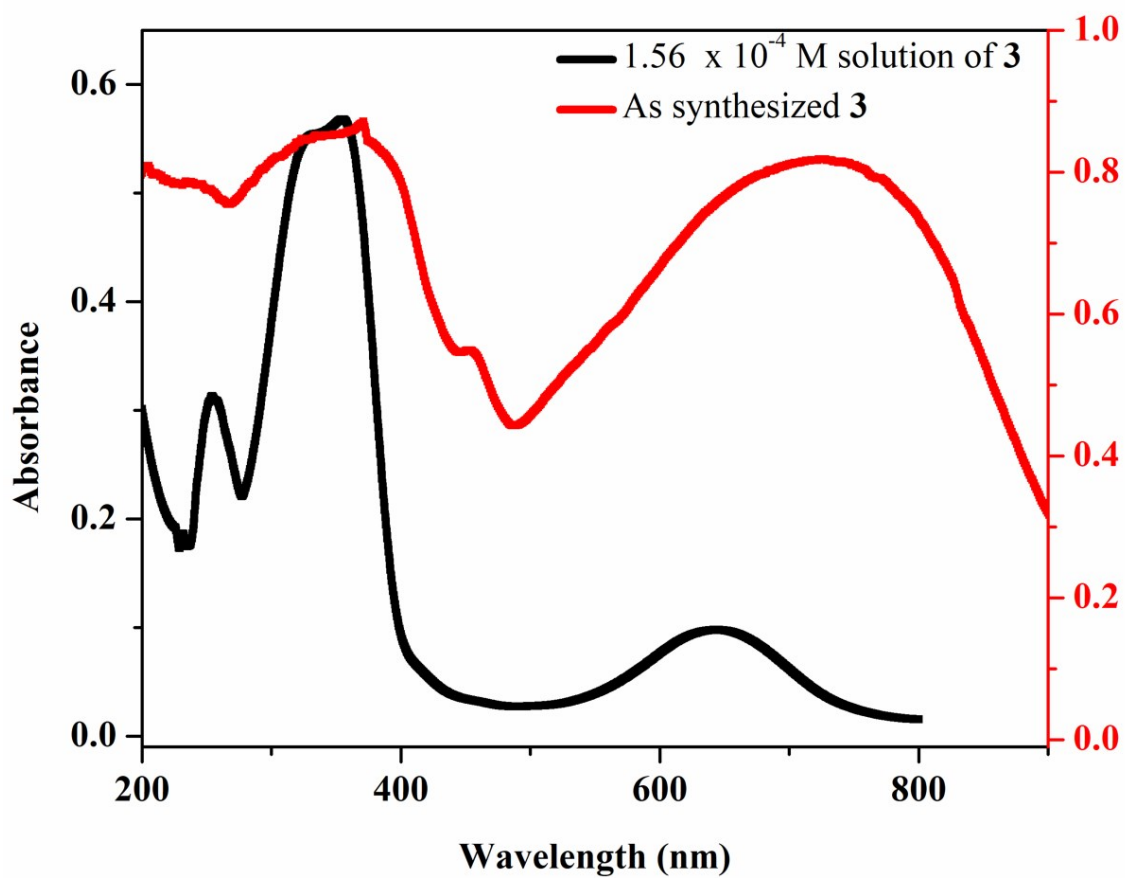

Figure S12: Comparison between UV-visible spectra of as synthesized **3** and  $1.56 \times 10^{-4}$  M solution of **3** in dimethyl sulphoxide recorded at room temperature.

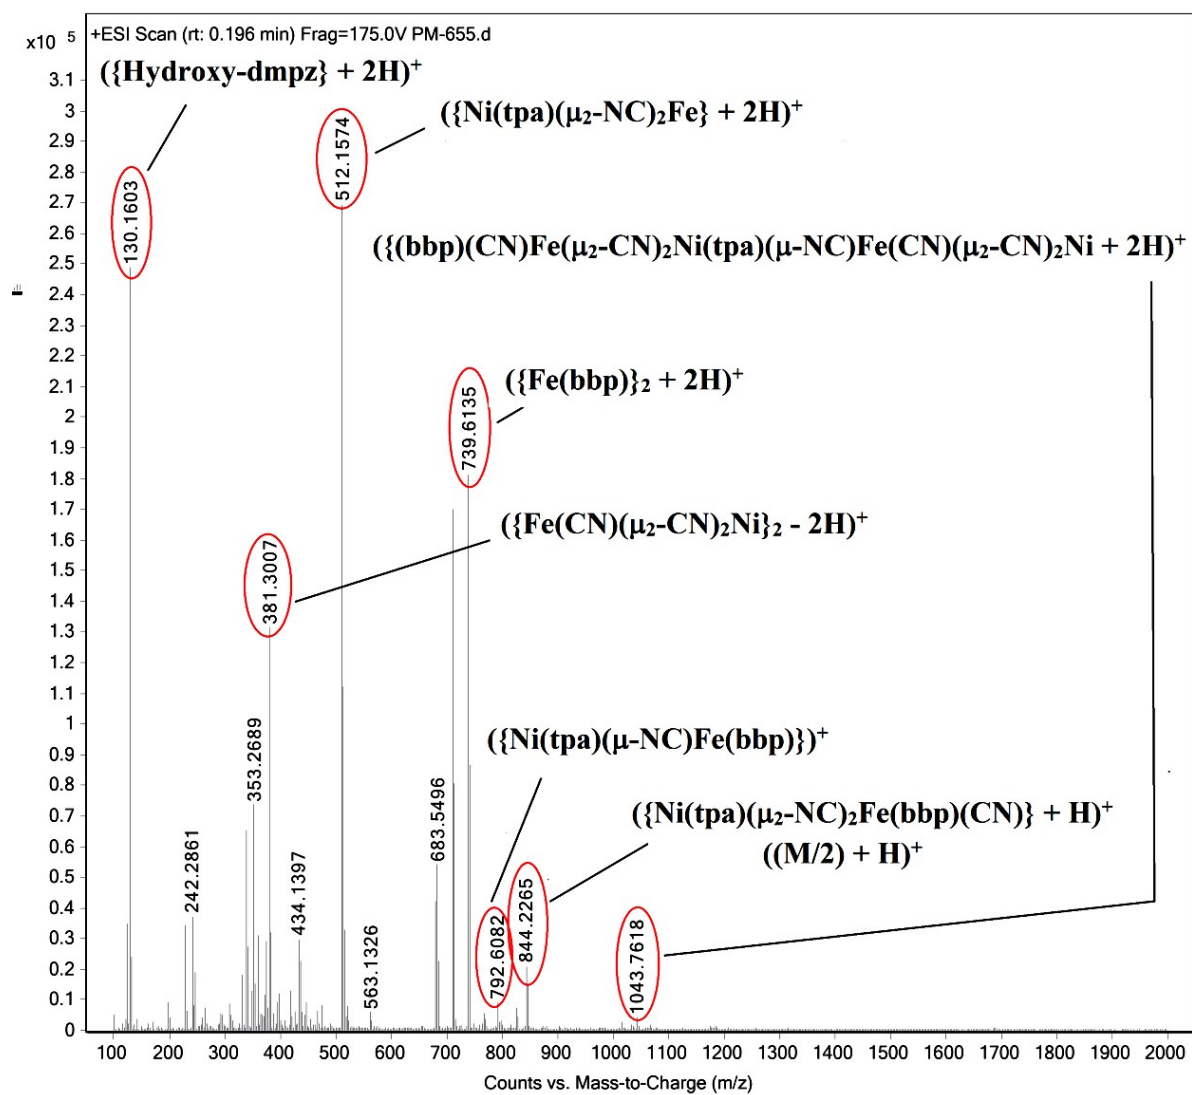

Figure S13: ESI-mass spectrum of **3** in dimethyl sulphoxide in the  $m/z$  range 100-2000.

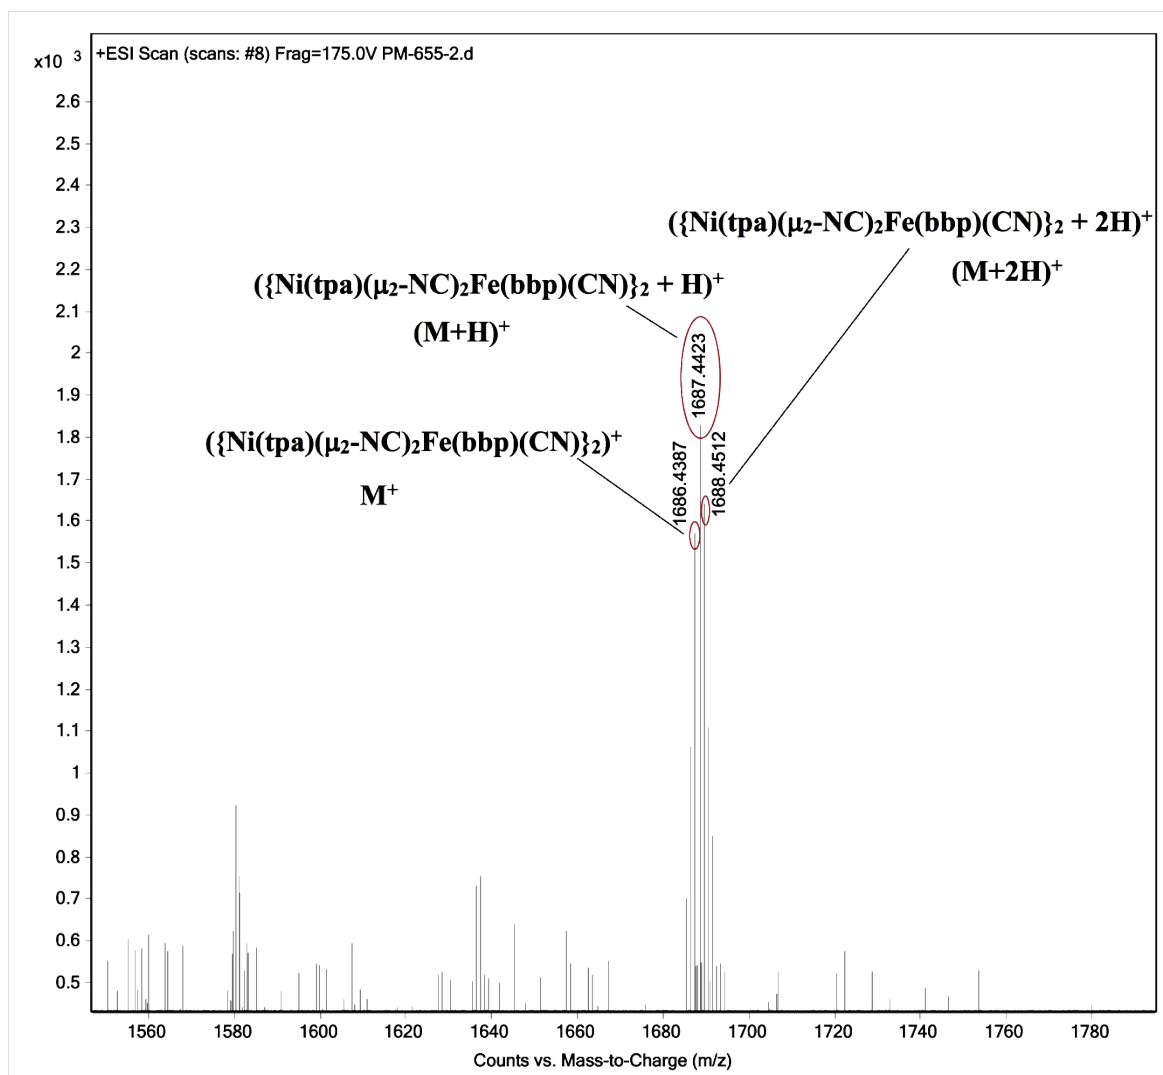

Figure S14: ESI-mass spectrum of **3** in dimethyl sulphoxide in the  $m/z$  range 1500-1800.



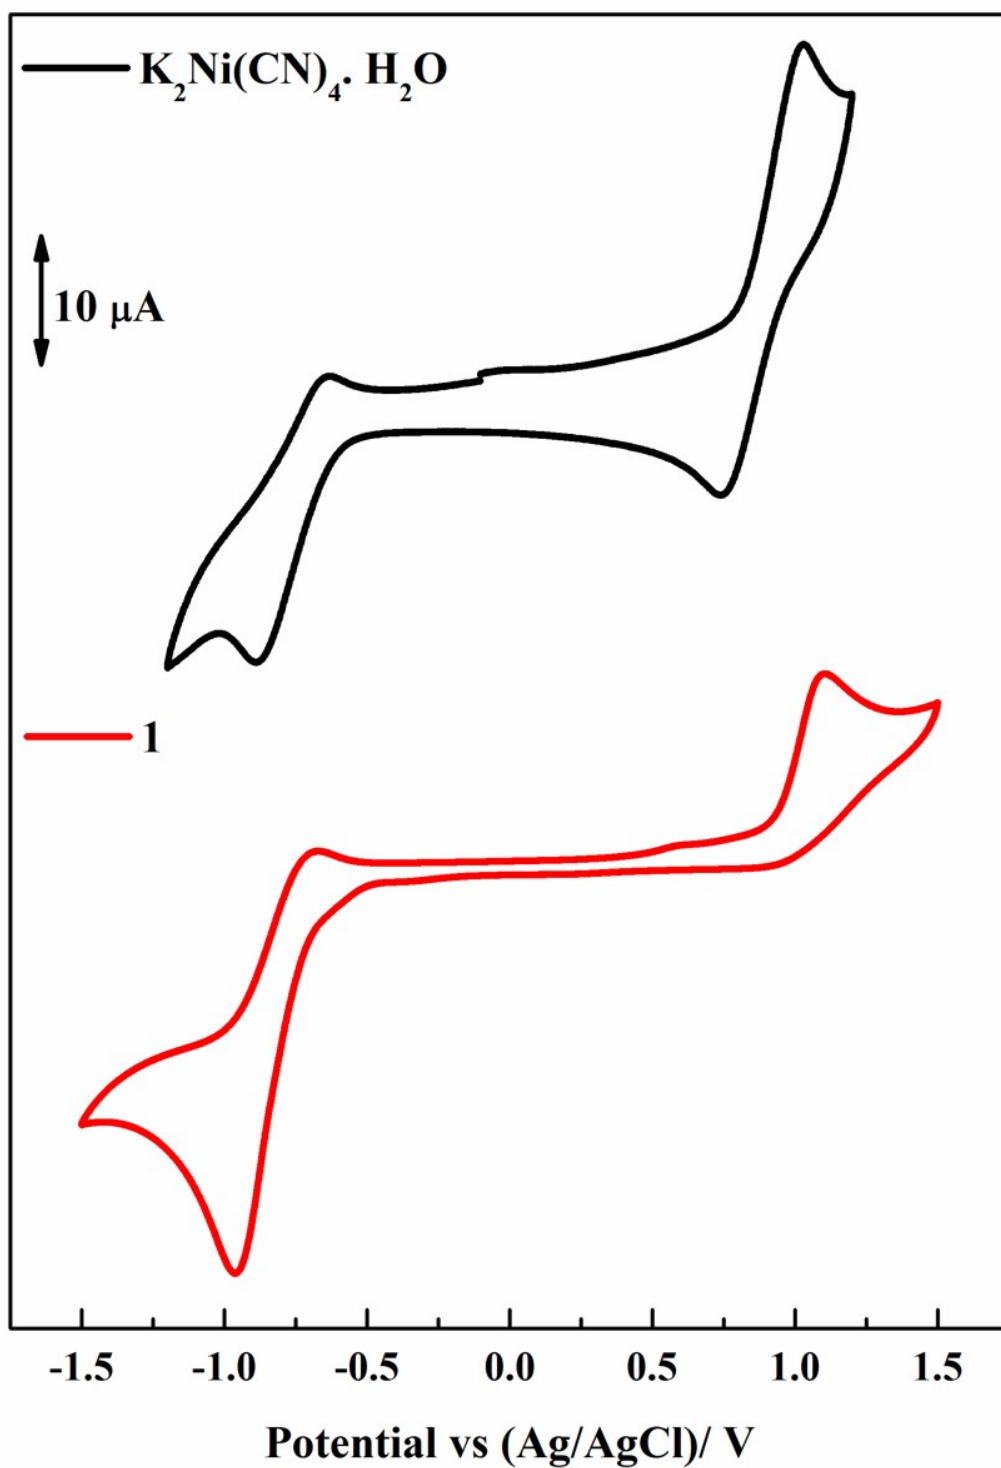

Figure S15: Cyclic voltammogram of **1** and  $\text{K}_2\text{Ni}(\text{CN})_4 \cdot \text{H}_2\text{O}$  measured in 0.1 M electrolyte at a scan rate of  $100 \text{ mV s}^{-1}$

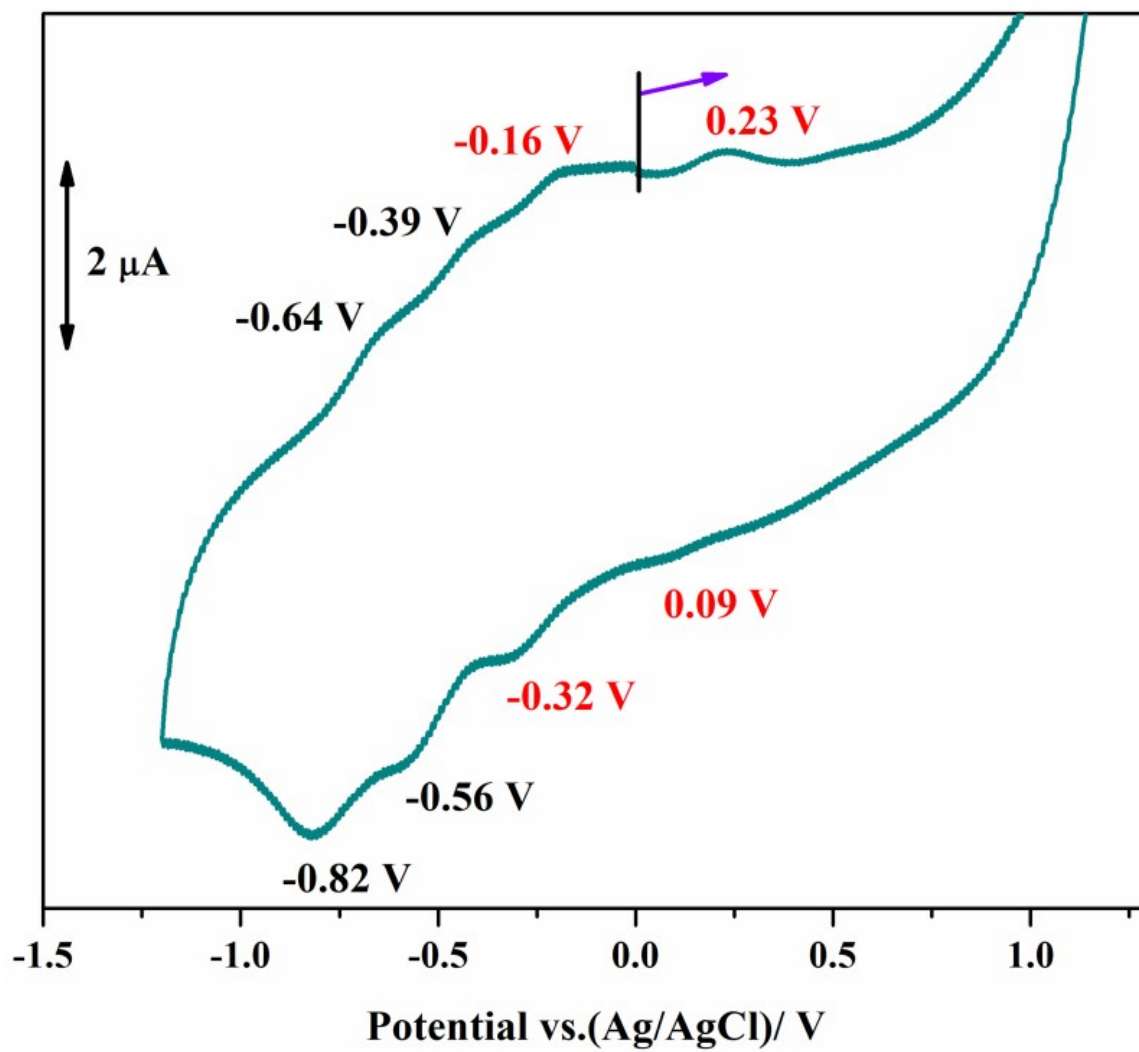

Figure S16: Cyclic voltammogram of 3 measured in 0.1 M electrolyte at a scan rate of 100 mV s<sup>-1</sup>

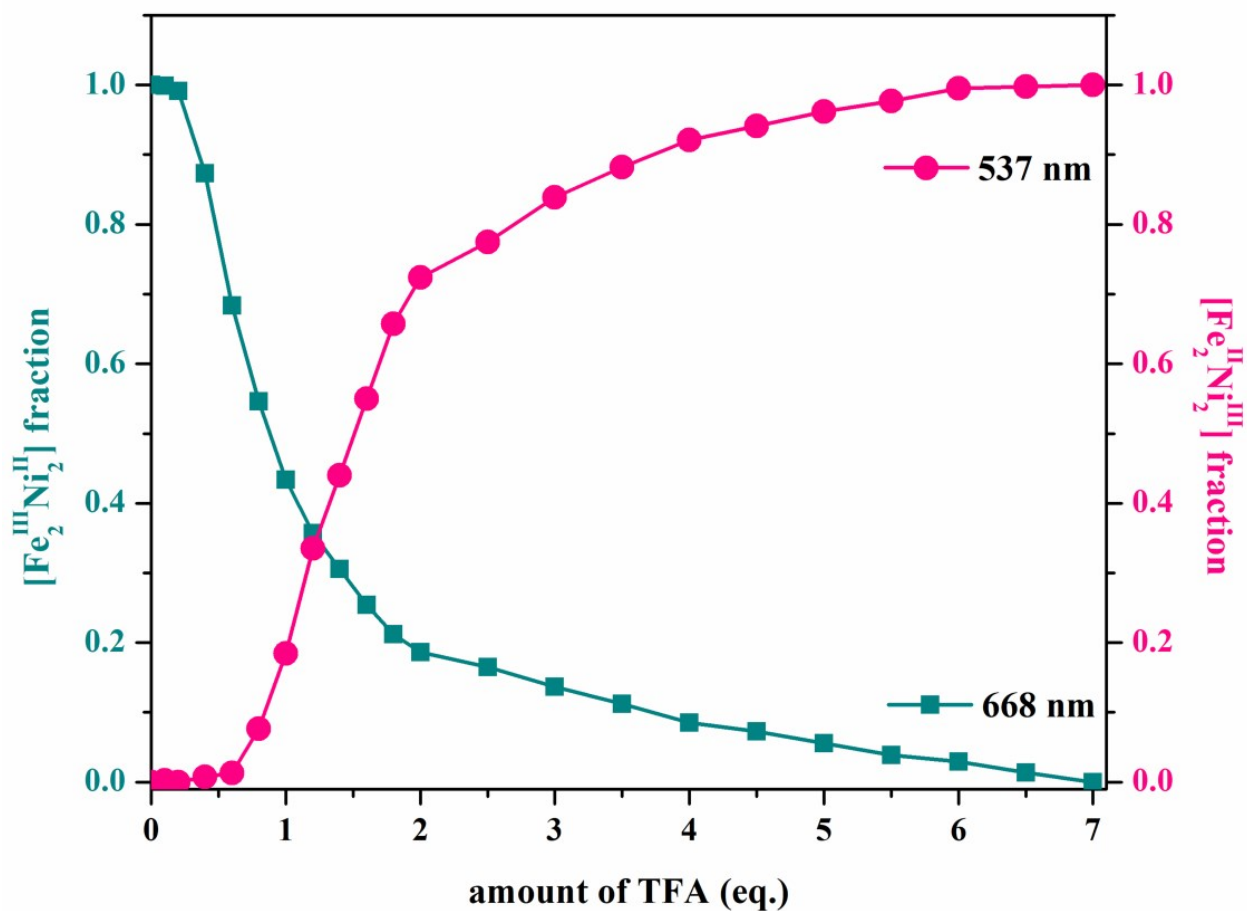

Figure S17: Acid dependence (in equivalent) of the  $\{\text{Fe}^{\text{III}}(\mu\text{-CN})\text{Ni}^{\text{II}}\}/\{\text{Fe}^{\text{II}}(\mu\text{-CN})\text{Ni}^{\text{III}}\}$  fraction for **3** estimated from the absorption intensities at the bands 668 nm (blue) and 537 nm (pink).

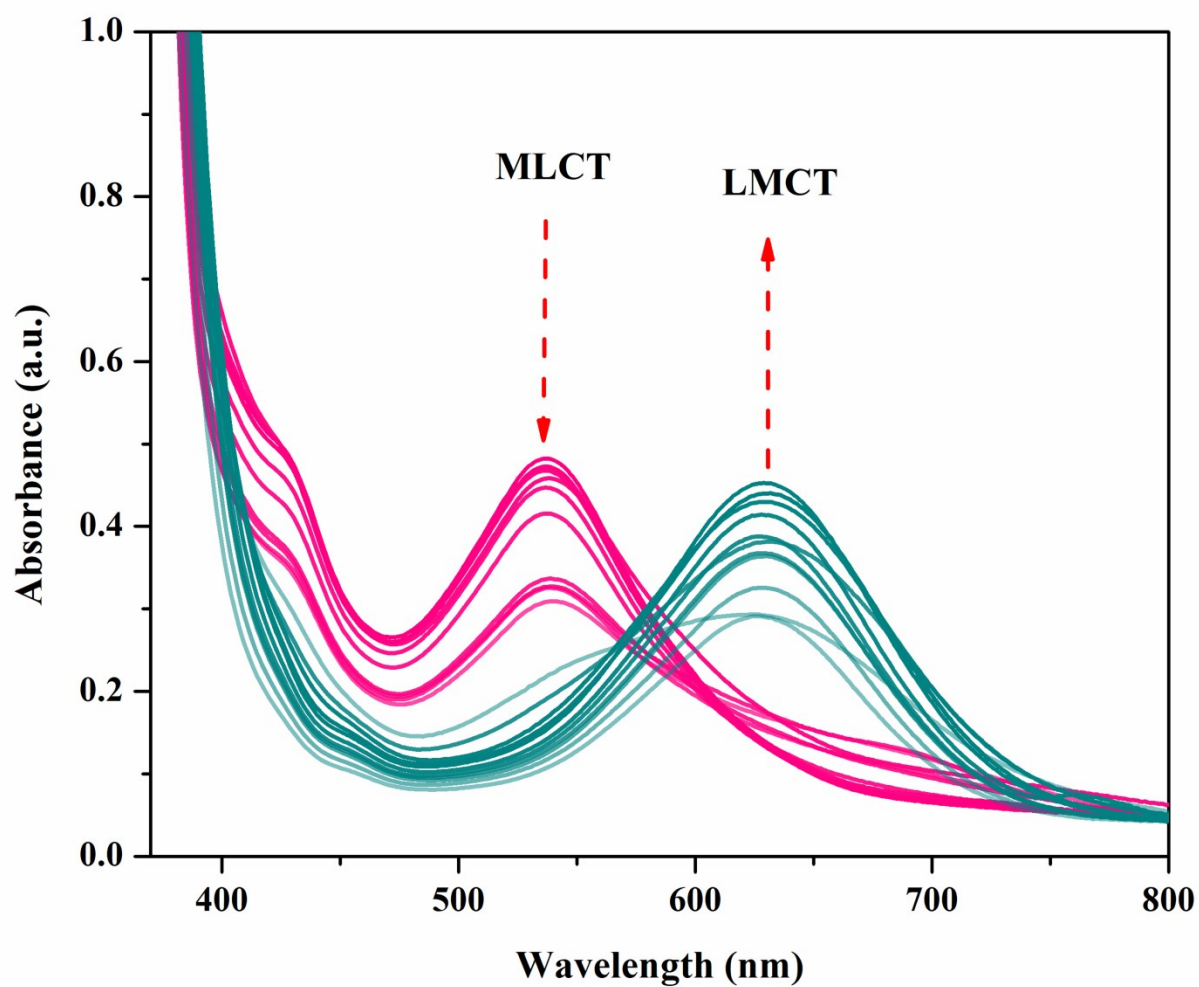

Figure S18: UV-visible spectral evolution of complex **3** upon TEA addition to a TFA added  $[\text{Fe}_2\text{Ni}_2]$  in DMSO solution ( $3.12 \times 10^{-4}$  M; From purple to blue, the base addition is increasing with an interval of (i) 0.2 eq. up to 1 eq. (ii) 0.4 eq. up to 7.8 eq.

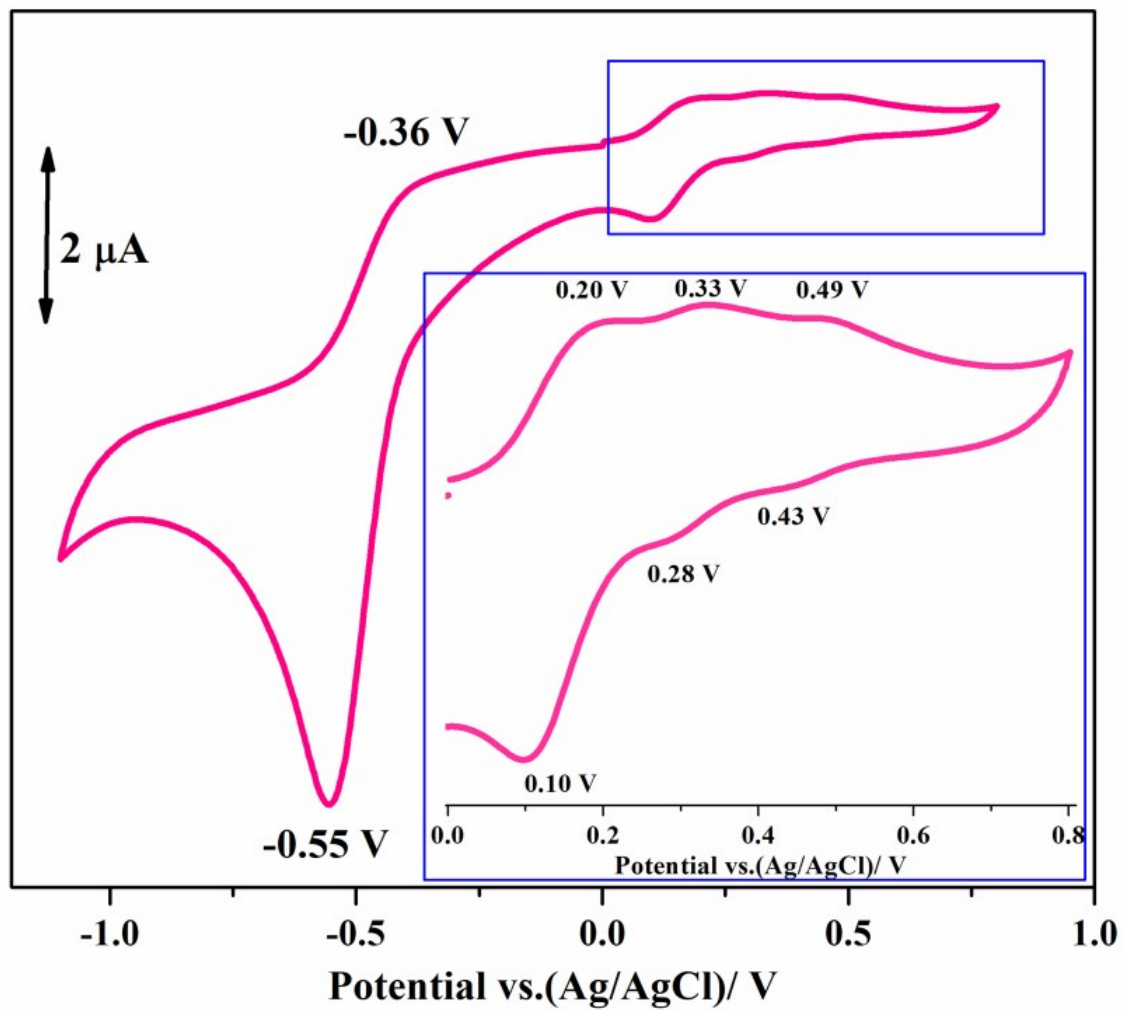

Figure S19: Cyclic voltammogram of **3** after acid addition measured in 0.1 M electrolyte at a scan rate of  $100 \text{ mV s}^{-1}$ .

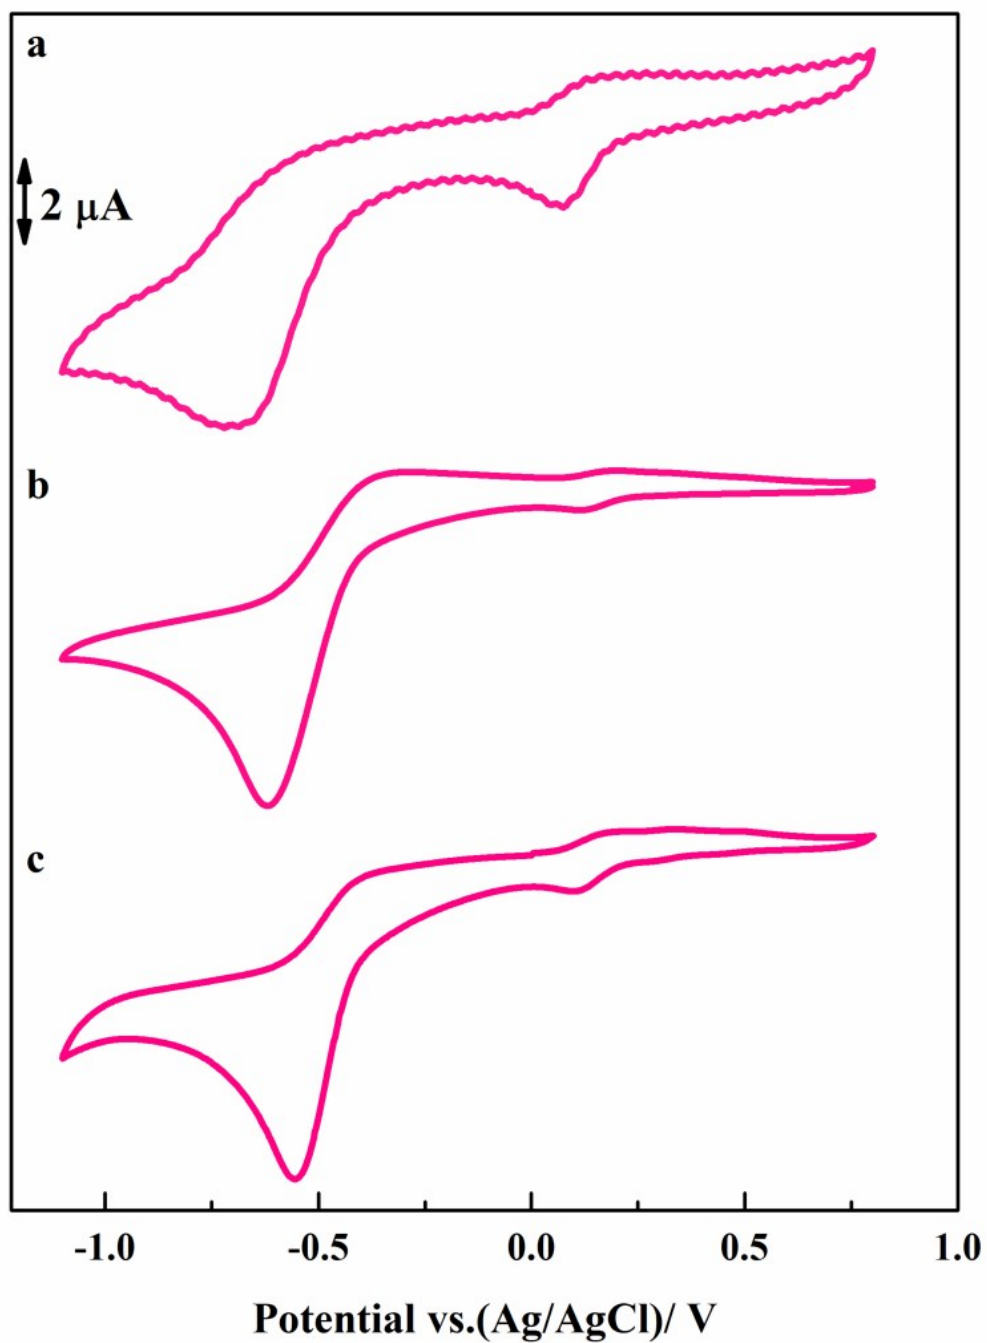

Figure S20: Cyclic voltammogram of **3** after acid addition measured at a scan rate of  $100 \text{ mV s}^{-1}$ . Cyclic voltammogram is collected after a) 4.2 eq.; b) 6.2eq. and c) 8.2 eq. of TFA addition.

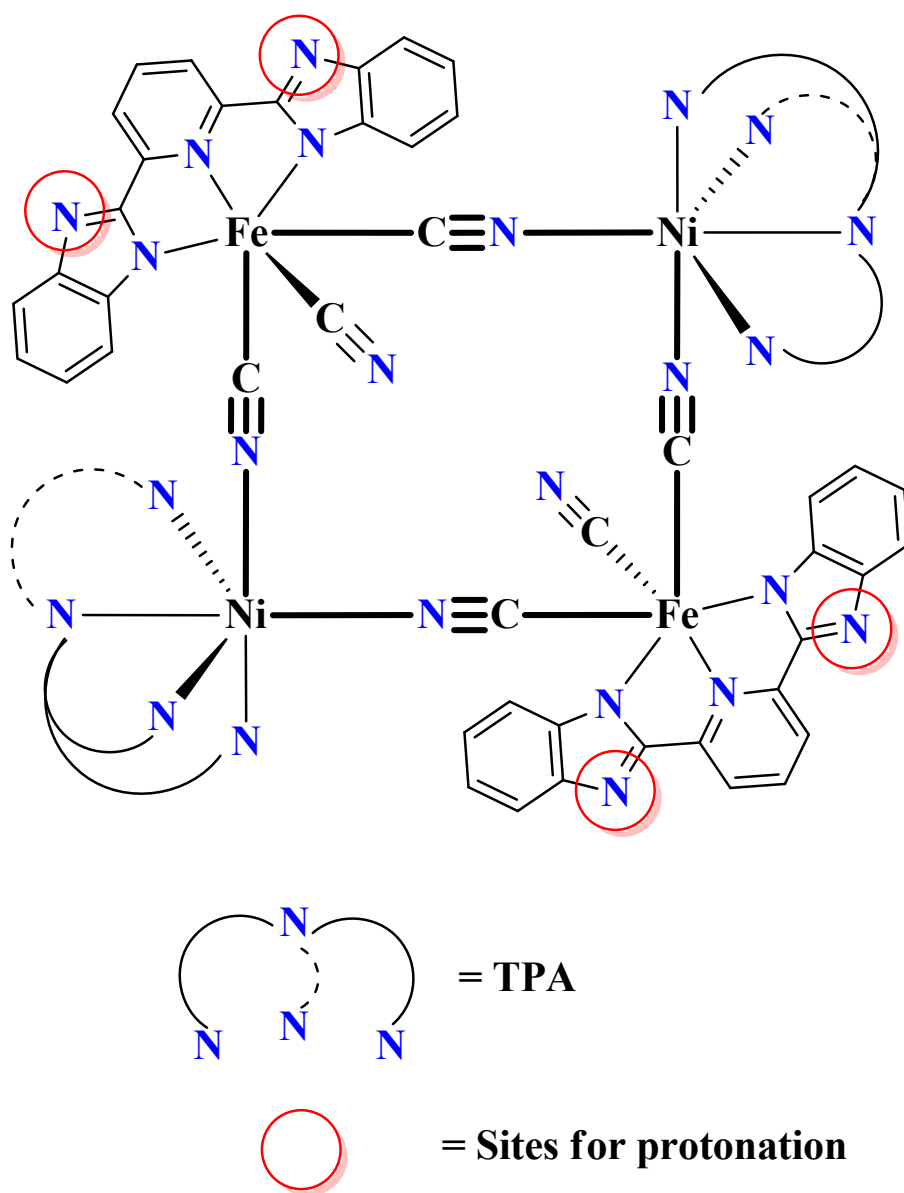

Figure S21: Possible sites for protonation in **3**

Table S1: Crystal data and refinement parameters of compound **1-3**

| Compound                          | <b>1</b>                                                                                       | <b>2</b>                                                                       | <b>3</b>                                                                                        |
|-----------------------------------|------------------------------------------------------------------------------------------------|--------------------------------------------------------------------------------|-------------------------------------------------------------------------------------------------|
| CCDC                              | 2020458                                                                                        | 1959339                                                                        | 1959340                                                                                         |
| Empirical formula                 | C <sub>84</sub> H <sub>94</sub> B <sub>2</sub> Cl <sub>2</sub> N <sub>14</sub> Ni <sub>2</sub> | C <sub>44</sub> H <sub>62</sub> N <sub>22</sub> Ni <sub>4</sub> O <sub>4</sub> | C <sub>80</sub> H <sub>96</sub> Fe <sub>2</sub> N <sub>30</sub> Ni <sub>2</sub> O <sub>10</sub> |
| Formula weight                    | 1509.67                                                                                        | 1197.88                                                                        | 1866.89                                                                                         |
| Temperature/K                     | 296                                                                                            | 100                                                                            | 100                                                                                             |
| Crystal system                    | Triclinic                                                                                      | Monoclinic                                                                     | Monoclinic                                                                                      |
| Space group                       | <i>P</i> $\bar{1}$                                                                             | <i>P</i> 2 <sub>1</sub> / <i>c</i>                                             | <i>C</i> 2/ <i>c</i>                                                                            |
| a/Å                               | 10.5897(5)                                                                                     | 8.473(11)                                                                      | 28.33(10)                                                                                       |
| b/Å                               | 11.6576(5)                                                                                     | 20.53(3)                                                                       | 13.73(4)                                                                                        |
| c/Å                               | 17.2621(7)                                                                                     | 17.43(2)                                                                       | 26.51(8)                                                                                        |
| $\alpha$ /°                       | 77.761(2)                                                                                      | 90                                                                             | 90                                                                                              |
| $\beta$ /°                        | 77.184(2)                                                                                      | 103.32(15)                                                                     | 105.62(6)                                                                                       |
| $\gamma$ /°                       | 87.782(2)                                                                                      | 90                                                                             | 90                                                                                              |
| Volume/ Å <sup>3</sup>            | 2030.62(16)                                                                                    | 2950(7)                                                                        | 9931(54)                                                                                        |
| Z                                 | 1                                                                                              | 2                                                                              | 4                                                                                               |
| Density (calc), mg/m <sup>3</sup> | 1.235                                                                                          | 1.339                                                                          | 1.246                                                                                           |
| $\mu$ / mm <sup>-1</sup>          | 0.582                                                                                          | 1.314                                                                          | 0.725                                                                                           |
| F(000)                            | 796                                                                                            | 1232                                                                           | 3880                                                                                            |
| Crystal size, mm <sup>3</sup>     | 0.36 x 0.18 x 0.09                                                                             | 0.26 x 0.21 x 0.13                                                             | 0.16 x 0.12 x 0.08                                                                              |
| Theta range for data collection   | 2.377 to 28.000°                                                                               | 2.319 to 27.000°                                                               | 2.159 to 20.832°                                                                                |
| Reflections collected             | 60784                                                                                          | 79489                                                                          | 56669                                                                                           |
| Independent reflections           | 9771                                                                                           | 6392                                                                           | 5152                                                                                            |
| Completeness to theta             | 99.9 %                                                                                         | 99.0 %                                                                         | 98.9 %                                                                                          |
| Data/restraints/<br>parameters    | 9771 / 0 / 472                                                                                 | 6392 / 0 / 335                                                                 | 5152 / 12 / 601                                                                                 |
| Goodness-of-fit on F <sup>2</sup> | 0.940                                                                                          | 1.021                                                                          | 0.924                                                                                           |
| Final R indices<br>[I ≥ 2σ(I)]    | R1 = 0.0418, wR2 =<br>0.1244                                                                   | R1 = 0.0561, wR2 =<br>0.1394                                                   | R1 = 0.0804, wR2 =<br>0.1814                                                                    |
| R indices (all data)              | R1 = 0.0708, wR2 =<br>0.1489                                                                   | R1 = 0.1062, wR2 =<br>0.1646                                                   | R1 = 0.1942, wR2 =<br>0.2414                                                                    |



Table S2: Selected bond lengths [Å] and bond angles [°] of **1**

| <b>Bond Length [Å]</b> |            | <b>Bond angles [°]</b> |           |
|------------------------|------------|------------------------|-----------|
| Ni(1)-N(1)             | 2.1669(17) | N(3)-Ni(1)-N(5)        | 158.59(8) |
| Ni(1)-N(3)             | 2.0792(18) | N(3)-Ni(1)-N(7)        | 91.64(7)  |
| Ni(1)-N(5)             | 2.1170(18) | N(5)-Ni(1)-N(7)        | 85.50(7)  |
| Ni(1)-N(7)             | 2.1310(18) | N(3)-Ni(1)-N(1)        | 79.84(7)  |
| Ni(1)-Cl(1)            | 2.4951(6)  | N(5)-Ni(1)-N(1)        | 78.75(6)  |
| Ni(1)-Cl(1)#1          | 2.3499(6)  | N(7)-Ni(1)-N(1)        | 81.38(7)  |

Table S3: Selected bond lengths [Å] and bond angles [°] of **2**

| <b>Bond Length [Å]</b> |          | <b>Bond angles [°]</b> |           |
|------------------------|----------|------------------------|-----------|
| Ni(1)-N(1)             | 2.178(4) | Ni(1)-N(8)-C(19)       | 164.9(3)  |
| Ni(1)-N(3)             | 2.087(4) | Ni(1)-N(9)-C(20)       | 166.3(3)  |
| Ni(1)-N(5)             | 2.130(5) | Ni(2)-C(21)-N(10)      | 178.4(5)  |
| Ni(1)-N(7)             | 2.162(4) | Ni(2)-C(22)-N(12)      | 176.6(4)  |
| Ni(1)-N(8)             | 2.028(5) | N(8)-Ni(1)-N(9)        | 89.85(15) |
| Ni(1)-N(9)             | 2.084(4) | C(19)-Ni(2)-C(20)      | 91.16(18) |

Table S4: Selected bond lengths [Å] and bond angles [°] of **3**

| Bond Length [Å] |           | Bond angles [°]      |          |
|-----------------|-----------|----------------------|----------|
| Ni(01)-N(1)     | 2.196(10) | N(1)-Ni(01)-N(3)     | 79.1(4)  |
| Ni(01)-N(3)     | 2.141(11) | N(1)-Ni(01)-N(5)     | 78.4(4)  |
| Ni(01)-N(5)     | 2.105(11) | N(1)-Ni(01)-N(7)     | 79.5(4)  |
| Ni(01)-N(7)     | 2.119(10) | N(1)-Ni(01)-N(140)   | 92.2(4)  |
| Ni(01)-N(13)    | 2.003(11) | C(38)-N(13)-Ni(01)   | 174.2(9) |
| Fe(02)-N(8)     | 1.958(10) | C(39)-N(140)-Ni(01)  | 176.3(9) |
| Fe(02)-N(9)     | 1.983(11) | N(8)-Fe(02)-C(38)    | 90.0(4)  |
| Fe(02)-N(11)    | 1.979(11) | N(9)-Fe(02)-C(38)    | 87.6(5)  |
| Fe(02)-C(38)    | 1.980(14) | N(11)-Fe(02)-C(38)   | 91.2(4)  |
| Fe(02)#1-C(39)  | 1.958(15) | C(40)-Fe(02)-C(38)   | 177.4(5) |
| Fe(02)-C(40)    | 1.967(15) | C(39)#1-Fe(02)-C(38) | 91.9(5)  |

Symmetry transformations used to generate equivalent atoms: #1  $-x+3/2, -y+1/2, -z+1$  #2  $-x+2, y, -z+3/2$

Table S5: Comparison of structural properties of cyano-bridged Fe<sup>III</sup>-Ni<sup>II</sup> square complexes based on tricyanidoiron (III) building block

| Compounds                                                                                                              | Fe···Ni(Å)         | N-Ni-N(°)    | C-Fe-C(°)    | Reference        |
|------------------------------------------------------------------------------------------------------------------------|--------------------|--------------|--------------|------------------|
| <b>[Fe(bbp)(CN)<sub>3</sub>Ni(tpa)]<sub>2</sub></b>                                                                    | <b>5.163-5.172</b> | <b>90.16</b> | <b>91.87</b> | <b>This work</b> |
| [(Tp)Fe(CN) <sub>3</sub> Ni(tren)] <sub>2</sub> (ClO <sub>4</sub> ) <sub>2</sub>                                       | 5.042-5.156        | 91.40        | 86.80        | 26               |
| [(Tp)Fe(CN) <sub>3</sub> Ni(bipy) <sub>2</sub> ] <sub>2</sub> [(Tp)Fe(CN) <sub>3</sub> ] <sub>2</sub>                  | 5.090-5.099        | 90.92        | 87.90        | 26               |
| [Fe(bbp)(CN) <sub>3</sub> Ni(tren)] <sub>2</sub>                                                                       | 5.046-5.156        | 92.10        | 86.49        | 22               |
| [(Tp*)Fe <sup>III</sup> (CN) <sub>3</sub> Ni(4-Clbpy) <sub>2</sub> ] <sub>2</sub>                                      | 5.063-5.085        | 90.32        | 87.86        | 32               |
| [(Tp*)Fe <sup>III</sup> (CN) <sub>3</sub> Ni(bipyrimidyl) <sub>2</sub> ] <sub>2</sub> (BF <sub>4</sub> ) <sub>2</sub>  | 5.081              | 90.61        | 87.10        | 31               |
| [(Tp)Fe <sup>III</sup> (CN) <sub>3</sub> Ni(phen) <sub>2</sub> ] <sub>2</sub> (ClO <sub>4</sub> ) <sub>2</sub>         | 5.086-5.116        | 91.03        | 88.60        | 31               |
| [(pzTp)Fe(CN) <sub>3</sub> Ni(dpa)](ClO <sub>4</sub> ) <sub>2</sub>                                                    | 5.089-5.100        | 93.18        | 85.36        | 25               |
| [(Tp)Fe(CN) <sub>3</sub> Ni(dmphen) <sub>2</sub> ] <sub>2</sub> (ClO <sub>4</sub> ) <sub>2</sub>                       | 5.166-5.170        | 86.58        | 88.26        | 30               |
| [(pzTp)Fe(CN) <sub>3</sub> Ni <sup>II</sup> (dmphen) <sub>2</sub> ] <sub>2</sub> (ClO <sub>4</sub> ) <sub>2</sub>      | 5.150-5.168        | 86.28        | 88.79        | 30               |
| [(Tp*)Fe <sup>III</sup> (CN) <sub>3</sub> Ni(DMF) <sub>4</sub> ] <sub>2</sub> (OTf) <sub>2</sub>                       | 5.249-5.255        | 93.81        | 84.98        | 27               |
| [(MeTp)Fe(CN) <sub>3</sub> Ni(tren)] <sub>2</sub> (ClO <sub>4</sub> ) <sub>2</sub>                                     | 5.047-5.153        | 92.00        | 86.66        | 33               |
| [( <i>i</i> -BuTp)Fe(CN) <sub>3</sub> Ni(tren)] <sub>2</sub> (ClO <sub>4</sub> ) <sub>2</sub>                          | 5.047-5.189        | 89.91        | 88.08        | 33               |
| [(Tp*)Fe(CN) <sub>3</sub> Ni(bipy) <sub>2</sub> ] <sub>2</sub> (OTf) <sub>2</sub>                                      | 5.077-5.097        | 95.07        | 83.76        | 28               |
| [TpFe(CN) <sub>3</sub> Ni(L <sup>1</sup> ) <sub>2</sub> ] <sub>2</sub> (ClO <sub>4</sub> ) <sub>2</sub>                | 5.117-5.126        | 93.17        | 87.08        | 29               |
| [( <i>i</i> -BuTp)Fe(CN) <sub>3</sub> Ni(L <sup>2</sup> ) <sub>2</sub> ] <sub>2</sub> (ClO <sub>4</sub> ) <sub>2</sub> | 5.120-5.134        | 91.45        | 87.13        | 29               |

Abbreviations used for the ligands: Tp = hydrotris(pyrazol-1-yl)borate; tren = tris(2-aminoethyl)amine; bipy = 2,2'-bipyridine; Tp\* = hydrotris(3,5-dimethylpyrazolyl)borate; 4-Clbpy = 4-chlorine-2,2'-dibipyridine; phen = 1,10-phenanthroline; pzTp = tetrakis(pyrazol-1-yl)borate; dpa = 2,2'-dipyridyl amine; dmphen = 2,9-dimethyl-1,10-phenanthroline; MeTp = methyltris(pyrazolyl)borate; OTf = trifluoromethanesulfonate; PhTp = tris(pyrazolyl)phenylborate; *i*-BuTp = 2-methylpropyltris(pyrazolyl)borate; L<sup>1</sup> = 4,5-[1',4']dithiino[2',3'-*b*]quinoxaline-2-bis(2-pyridyl)methylene-1,3-dithiole; L<sup>2</sup> = dimethyl-2-[di(pyridin-2-yl)methylene]-1,3-dithiole-4,5-dicarboxylate.

Table S6: Selected magneto-structural data for heterometallic tetranuclear Fe<sup>III</sup>-( $\mu$ -CN)-Ni<sup>II</sup> square complexes

| Compounds                                                                                                         | $\chi_M T$ (a/b)<br>at RT | Max $\chi_M T$ | $M_S$<br>( $\mu\beta$ ) | g          | J/K         | Ref.             |
|-------------------------------------------------------------------------------------------------------------------|---------------------------|----------------|-------------------------|------------|-------------|------------------|
| <b>[Fe(bbp)(CN)<sub>3</sub>Ni(tpa)]<sub>2</sub></b>                                                               | <b>3.44 a</b>             | <b>5.90 a</b>  | <b>5.60</b>             | <b>2.2</b> | <b>5.92</b> | <b>This work</b> |
| [(Tp)Fe(CN) <sub>3</sub> Ni(tren)] <sub>2</sub> (ClO <sub>4</sub> ) <sub>2</sub>                                  | 3.57 b                    | 5.69 b         | 4.97                    | 2.22       | 6.4         | 26               |
| [(Tp)Fe(CN) <sub>3</sub> Ni(bipy) <sub>2</sub> ][(Tp)Fe(CN) <sub>3</sub> ] <sub>2</sub>                           | 6.81 b                    | 208.6 b        | 9.52                    | 2.67       | 10.5        | 26               |
| [Fe(bbp)(CN) <sub>3</sub> Ni(tren)] <sub>2</sub>                                                                  | 3.52 a                    | 5.24 a         | 6.34                    | 2.23       | 4.4         | 22               |
| [(Tp*)Fe <sup>III</sup> (CN) <sub>3</sub> Ni(4-Clbpy) <sub>2</sub> ] <sub>2</sub>                                 | 3.28 a                    | 10.60 a        | 3.84                    | 2.07       | 6.7         | 32               |
| [(Tp*)Fe <sup>III</sup> (CN) <sub>3</sub> Ni(bipyrimidyl) <sub>2</sub> ](BF <sub>4</sub> ) <sub>2</sub>           | 3.54 a                    | 13.89 a        | 6.32                    | 2          | -           | 31               |
| [(Tp)Fe <sup>III</sup> (CN) <sub>3</sub> Ni(phen) <sub>2</sub> ] <sub>2</sub> (ClO <sub>4</sub> ) <sub>2</sub>    | 3.63 a                    | 6.55 a         | 6.46                    | 2          | -           | 31               |
| [(pzTp)Fe(CN) <sub>3</sub> Ni(dpa)](ClO <sub>4</sub> ) <sub>2</sub>                                               | 3.28 a                    | 9.60 a         | 6.48                    | 2.23       | 10.1        | 25               |
| [(Tp)Fe(CN) <sub>3</sub> Ni(dmphen) <sub>2</sub> ] <sub>2</sub> (ClO <sub>4</sub> ) <sub>2</sub>                  | 4.09 a                    | 8.26 a         | 6.55                    | 2.30-2.21  | 30.7-27.0   | 30               |
| [(pzTp)Fe(CN) <sub>3</sub> Ni <sup>II</sup> (dmphen) <sub>2</sub> ] <sub>2</sub> (ClO <sub>4</sub> ) <sub>2</sub> | 3.72 a                    | 13.03 a        | 6.60                    | 2.39- 2.20 | 24.4-17.9   | 30               |
| [(Tp*)Fe <sup>III</sup> (CN) <sub>3</sub> Ni(DMF) <sub>4</sub> ](OTf) <sub>2</sub>                                | 4.1 b                     | 8.27 b         | 6.11                    | 2.20       | 7.6         | 27               |
| [(PhTp)Fe(CN) <sub>3</sub> Ni(tren)] <sub>2</sub> (ClO <sub>4</sub> ) <sub>2</sub>                                | 3.72 b                    | 6.97 b         | 5.84                    | 2.284      | 6.0         | 33               |
| [(MeTp)Fe(CN) <sub>3</sub> Ni(tren)] <sub>2</sub> (ClO <sub>4</sub> ) <sub>2</sub>                                | 3.76 b                    | 5.98 b         | 5.19                    | 2.305      | 4           | 33               |
| [(i-BuTp)Fe(CN) <sub>3</sub> Ni(tren)] <sub>2</sub> (ClO <sub>4</sub> ) <sub>2</sub>                              | 3.76 b                    | 7.25 b         | 5.66                    | 2.285      | 7.8         | 33               |
| [(Tp*)Fe(CN) <sub>3</sub> Ni(bipy) <sub>2</sub> ](OTf) <sub>2</sub>                                               | 3.8 a                     | 7.7 a          | 6.00                    | 2.29       | 9.4         | 28               |
| [TpFe(CN) <sub>3</sub> Ni(L <sup>1</sup> ) <sub>2</sub> ] <sub>2</sub> (ClO <sub>4</sub> ) <sub>2</sub>           | 3.34 b                    | 5.79           | 4.40                    | 2.14       | 6.1         | 29               |
| [(i-BuTp)Fe(CN) <sub>3</sub> Ni(L <sup>2</sup> ) <sub>2</sub> ] <sub>2</sub> (ClO <sub>4</sub> ) <sub>2</sub>     | 3.35 b                    | 6.14           | 4.32                    | 2.14       | 6.0         | 29               |

\*Where, a=cm<sup>3</sup> mol<sup>-1</sup> K & b = emu mol<sup>-1</sup> K, M= Magnetization, H= Magnetic Field, J= exchange interaction.

Table S7: Electrochemical results of compound **1**, **2** & **3**

| Complex                           | $E_{pa}(V)$ | $E_{pc}(V)$ | $E_{1/2}(V)$ | $\Delta E_p(V)$ |
|-----------------------------------|-------------|-------------|--------------|-----------------|
| $K_2Ni(CN)_4 \cdot H_2O$          | -0.63       | -0.88       | -0.76        | 0.25            |
|                                   | 1.03        | 0.74        | 0.89         | 0.29            |
| $(TBA)_2[Fe(bbp)(CN)_3]$          | -0.63       | -0.77       | -0.70        | 0.14            |
| <b>1</b>                          | 0.61        | -           | -            | -               |
|                                   | 1.10        | -           | -            | -               |
|                                   | -0.67       | -0.95       | -0.81        | 0.28            |
| <b>2</b>                          | 0.94        | 0.85        | 0.89         | 0.09            |
|                                   | 0.64        | -           | -            | -               |
|                                   | -0.66       | -0.94       | -0.8         | 0.28            |
| <b>3</b>                          | -0.64       | -0.82       | -0.73        | 0.18            |
|                                   | -0.39       | -0.56       | -0.47        | 0.18            |
|                                   | -0.16       | -0.32       | -0.24        | 0.16            |
|                                   | 0.23        | 0.09        | 0.16         | 0.14            |
| <b>3</b><br>(after acid addition) | -0.36       | -0.55       | -0.45        | 0.19            |
|                                   | 0.20        | 0.10        | 0.15         | 0.10            |
|                                   | 0.33        | 0.28        | 0.30         | 0.05            |
|                                   | 0.49        | 0.43        | 0.46         | 0.06            |

$E_{pa}$  =oxidative peak potential.  $E_{pc}$  = reductive peak potential.  $E_{1/2} = (E_{pc} + E_{pa})/2$ ,

$\Delta E_p = E_{pa} - E_{pc}$ .

## References:

1. X. Jiang, B. Tao, X. Yu, Y. Wang and H. Xia, *RSC Advances*, 2015, **5(25)**, 19034-19040.
2. P. -F. Zhuang, Y. -J. Zhang, H. Zheng, C. -Q. Jiao, L. Zhao, J. -L. Wang, C. He, C.-Y. Duan and T. Liu, *Dalton Trans.*, 2015, **44**, 3393-3398.
3. B. Nowicka, M. Reczyński, M. Rams, W. Nitek, J. Żukrowski, C. Kapusta and B. Sieklucka, *Chem. Commun.*, 2015, **51**, 11485-11488.
4. J. Kim, S. Han, K. I. Pokhodnya, J. M. Migliori and J. S. Miller, *Inorg. Chem.*, 2005, **44(20)**, 6983-6988.
